# Supplementary material
Source: PubMed Central journal article supplement (PMC2836685)
Supplement: supp_0912622107_pnas.200912622SI.pdf [file supp_0912622107_pnas.200912622SI.pdf]

**Supporting Information (SI)**

**The evolution of vertebral numbers in recent and fossil amniotes: The roles of homeotic effects and somitogenesis**

**Johannes Müller\*. Museum für Naturkunde – Leibniz-Institut für Evolutions- und Biodiversitätsforschung an der Humboldt-Universität zu Berlin, Invalidenstr. 43, D-10115 Berlin, Germany, [johannes.mueller@mfn-berlin.de](mailto:johannes.mueller@mfn-berlin.de)**

**Torsten M. Scheyer. Paläontologisches Institut und Museum, Universität Zürich, Karl-Schmid Strasse 4, CH-8006 Zürich, Switzerland**

**Jason J. Head. Dept. of Biology, University of Toronto at Mississauga, 3359 Mississauga Rd., Mississauga, ON, L5L 1C6, Canada**

**Paul M. Barrett. Department of Palaeontology, Natural History Museum, Cromwell Road, London SW7 5BD, UK**

**Ingmar Werneburg. Paläontologisches Institut und Museum, Universität Zürich, Karl-Schmid Strasse 4, CH-8006 Zürich, Switzerland**

**Per G. P. Ericson. Department of Vertebrate Zoology, Swedish Museum of Natural History, P.O. Box 50007, SE-10405 Stockholm, Sweden**

**Diego Pol. CONICET, Museo Paleontológico Egidio Feruglio, Av. Fontana 140, Trelew CP 9100, Argentina**

Marcelo R. Sánchez-Villagra\*. Paläontologisches Institut und Museum,  
Universität Zürich, Karl-Schmid Strasse 4, CH-8006 Zürich, Switzerland,

[m.sanchez@pim.uzh.ch](mailto:m.sanchez@pim.uzh.ch)

## Contents

### 1. Data set of vertebral count numbers

### 2. Reconstructed values and CP ratio for selected taxa and nodes

### 3. Source of phylogenetic framework for the clades examined

### 4. Tree topologies used

### 5. References

### 6. Sources of sketches in Figure 2 of main text

### 7. Output of the correlation analyses

### 1. Data set of vertebral count numbers

## Synapsida

| Taxon                                     | Presacral | Cervical | References                                                      |
|-------------------------------------------|-----------|----------|-----------------------------------------------------------------|
| <b>Synapsida</b>                          |           |          |                                                                 |
| <i>Casea</i>                              | 24.5      | ?        | 1 (Romer & Price 1940)                                          |
| <i>Casea broillii</i>                     | 25        | 6        | 2 (Williston 1916)                                              |
| <i>Casea nicholsi</i>                     | 24        | 6        | 3 (Olson 1968)<br>3 (Olson 1968) / 4 (Stovall et al.<br>6 1966) |
| <i>Cotylorhynchus romeri</i>              | 26        | 6        | 6 1966)                                                         |
| <i>Aerosaurus wellesi</i>                 | 26        | 5.5      | 5 (Langston & Reisz 1981)                                       |
| <i>Edaphosaurus boanerges</i>             | 24        | ?        | 6 (Reisz 1986)                                                  |
| <i>Haptodus (Pantelosaurus) saxonicus</i> | 27        | 5.5      | 7 (von Huene 1925)                                              |
| <i>Hipposaurus</i>                        | 28        | 7        | 8 (Colbert 1948)                                                |
| <i>Tapinocanius pamela</i>                | 29        | 8        | 9 (Govender et al. 2002)                                        |
| <i>Scymnognathus</i>                      | 27        | 7        | 8 (Colbert 1948)                                                |
| <i>Arctognathoides</i>                    | ?         | 7        | 8 (Colbert 1948)                                                |
| <i>Aelurognathus</i>                      | ?         | 7        | 8 (Colbert 1948)                                                |
| <i>Inostrancevia</i>                      | 26        | 7        | 8 (Colbert 1948)                                                |
| <i>Diictodon feliceps</i>                 | 27        | 6        | 10 (Ray & Chinsamy 2003)                                        |
| <i>Cistecephalus</i>                      | ?         | 5        | 11 (Cluver 1978)                                                |
| <i>Aulacocephalodon peavoti</i>           | 26        | ?        | 12 (Olson and Byrne 1938)                                       |
| <i>Wadisasaurus indicus</i>               | 25        | 7        | 13 (Ray 2006)                                                   |
| <i>Lystrosaurus</i>                       | ?         | 6        | 13 (Ray 2006)                                                   |
| <i>Glanosuchus</i>                        | 27.5      | 5.5      | 14 (Fourie & Rubidge 2007)                                      |

|                                             |    |     |                                                 |
|---------------------------------------------|----|-----|-------------------------------------------------|
| <i>Cynariognathus</i>                       | 27 | 7   | 14 (Fourie & Rubidge 2007)                      |
| <i>Macroscelosaur</i>                       | 27 | 7   | 14 (Fourie & Rubidge 2007)                      |
| <i>Mirothentes</i>                          | ?  | 7   | 14 (Fourie & Rubidge 2007)                      |
| <i>Homodontosaurus kitchingi</i>            | ?  | ?   | 15 (Brink 1950)                                 |
| <i>Zorillodontops</i>                       | ?  | 6.5 | 14 (Fourie & Rubidge 2007)                      |
| <i>Regisaurus</i>                           | 28 | 6   | 14 (Fourie & Rubidge 2007)                      |
| <i>Scaloposaurus</i>                        | ?  | 6   | 14 (Fourie & Rubidge 2007)                      |
| <i>Erciolacerta</i>                         | ?  | 6.5 | 14 (Fourie & Rubidge 2007)                      |
| <i>Theriognathus (=Aneugomphius)</i>        | 27 | 5.5 | 14 (Fourie & Rubidge 2007)                      |
| <i>Procynosuchus (=Levachia duvenhagei)</i> | 26 | 6   | 16 (Broom 1948); 17 (Brink & Kitching 1953)     |
| <i>Thrinaxodon liorhinus</i>                | 26 | 5   | 18 (Brink 1954)                                 |
| <i>Thrinaxodon liorhinus</i>                | 27 | 7   | 19 (Jenkins 1971); 20 (Colbert & Kitching 1977) |
| <i>Massetognathus pascuali</i>              | 26 | 7   | 21 (Jenkins 1970)                               |
| <i>Cynognathus</i>                          | 29 | 7   | 22 (Seeley 1895); 19 (Jenkins 1971)             |
| <i>Exaeretodon sp.</i>                      | 28 | ?   | 23 (Bonaparte 1963)                             |
| Monotremata                                 | 26 | 7   | 24 (Sánchez-Villagra et al. 2007)               |
| Eutheria                                    | 26 | 7   | 24 (Sánchez-Villagra et al. 2007)               |
| Metatheria                                  | 26 | 7   | 24 (Sánchez-Villagra et al. 2007)               |

## Parareptilia

| Taxon                   | Presacral | Cervical | References                                       |
|-------------------------|-----------|----------|--------------------------------------------------|
| <b>Mesosauridae</b>     |           |          |                                                  |
| <i>Stereosternum</i>    | 30        | 12       | 25 (Modesto 1999); 26 (Oelofsen and Araújo 1987) |
| <i>Mesosaurus</i>       | 29        | 11       | pers. obs. JM                                    |
| <b>Millerettidae</b>    |           |          |                                                  |
| <i>Broomia</i>          | 25        | ?        | 27 (Thommasen and Carroll 1981)                  |
| <i>Milleretta</i>       | 24        | ?        | 28 (Gow 1972)                                    |
| <i>Milleropsis</i>      | 31        | 4        | 29 (Watson 1957)                                 |
| <i>Eunotosaurus</i>     | 15        | 5        | 30 (Gow 1997); 31 (Gow and de Klerk 1997)        |
| <i>Nyctiphruretus</i>   | 24        | 8        | pers. obs. JM                                    |
| <i>Macroleter</i>       | 23        | 4 to 5   | Linda Tsuji, pers. Comm.                         |
| <b>Bolosauridae</b>     |           |          |                                                  |
| <i>Belebey</i>          | 23 to 24  | ?        | pers. obs. JM                                    |
| <i>Eudibamus</i>        | 26        | 5 to 6   | 32 (Berman et al. 2000); pers. Obs. JM           |
| <b>Procolophonoidea</b> |           |          |                                                  |
| <i>Barasaurus</i>       | 26        | 6        | pers. obs. JM                                    |
| 'Owenetta'              | 26 to 27  | 6        | 33 (Reisz and Scott 2002)                        |
| <i>Procolophon</i>      | 27        | 8        | 34 (DeBraga 2003); 35 (Cisneros 2008)            |
| <b>Pareiasauridae</b>   |           |          |                                                  |
| <i>Bradysaurus</i>      | 20        | 5        | 36 (Lee 1997); Linda Tsuji pers. comm.           |
| <i>Embrithosaurus</i>   | 20        | ?        | 36 (Lee 1997); Linda Tsuji pers. comm.           |
| <i>Deltavjatia</i>      | 19        | ?        | 36 (Lee 1997); Linda Tsuji pers. comm.           |
| <i>Pareiasuchus</i>     | 19        | ?        | 36 (Lee 1997); Linda Tsuji pers. comm.           |
| <i>Scutosaurus</i>      | 19        | 5        | 36 (Lee 1997); Linda Tsuji pers. comm.           |
| <i>Anthodon</i>         | 19        | 5        | 36 (Lee 1997); Linda Tsuji pers. comm.           |

## Diadectomorpha

| Taxon                 | Presacral | Cervical | References                                             |
|-----------------------|-----------|----------|--------------------------------------------------------|
| <b>Diadectomorpha</b> |           |          |                                                        |
| <i>Diadectes</i>      | 21        | ?        | 37 (Berman et al. 2004), 38 (Carroll 1969)             |
| <i>Diasparactus</i>   | 22        | ?        | 37 (Berman et al. 2004)                                |
| <i>Limnoscelis</i>    | 26        | 5        | pers. obs. JM<br>37 (Berman et al. 2004); cervical no. |
| <i>Orobates</i>       | 26        | 6        | corrected by JM                                        |

## Early Eureptilia and Diapsida

| Taxon                             | Presacral | Cervical | References                                                        |
|-----------------------------------|-----------|----------|-------------------------------------------------------------------|
| <b>Basal Eureptilia</b>           |           |          |                                                                   |
| <b>Captorhinidae</b>              |           |          |                                                                   |
| <i>Thuringothyris</i>             | 26        | 5 to 6   | 39 (Müller et al. 2006)                                           |
| <i>Rhiodenticulatus</i>           | 25        | ?        | 40 (Berman and Reisz 1986)                                        |
| <i>Captorhinus</i>                | 25        | 5        | 41 (Heaton and Reisz 1980)                                        |
| <i>Labidosaurus</i>               | 25        | 5        | 42 (Sumida 1987)                                                  |
| <br>                              |           |          |                                                                   |
| <i>Protorothyris</i>              | 23        | 5        | 43 (Clark and Carroll 1973)                                       |
| <i>Paleothyris</i>                | 32        | 4        | 44 (Carroll 1969)                                                 |
| <i>Hylonomus</i>                  | 26        | 5        | 45 (Carroll 1964)                                                 |
| <i>Coelostegus</i>                | 29        | 5        | 43 (Clark and Carroll 1973)                                       |
| <i>Anthracosdromeus</i>           | 32        | 4        | 43 (Clark and Carroll 1973)                                       |
| <i>Brouffia</i>                   | 31        | 4        | 43 (Clark and Carroll 1973)                                       |
| <i>Cephalerpeton</i>              | 28        | 5        | 46 (Carroll and Baird 1972)                                       |
| <br>                              |           |          |                                                                   |
| <b>Basal Diapsida</b>             |           |          |                                                                   |
| <i>Petrolacosaurus</i>            | 26        | 6        | 47 (Reisz 1981)                                                   |
| <i>Araeoscelis</i>                | 28 to 29  | 9        | 48 (Reisz et al. 1984)                                            |
| <i>Spinoaequalis</i>              | 22        | ?        | 49 (de Braga and Reisz 1995)                                      |
| <i>Youngina</i>                   | 23        | 4 to 5   | 50 (Gow 1975)                                                     |
| <i>Saurosternon</i>               | ?         | ?        | 51 (Carroll 1975)                                                 |
| <i>Palaeagama</i>                 | 23        | 6 to 7   | 51 (Carroll 1975)                                                 |
| <i>Coelurosauravus</i>            | 21        | 8        | 52 (Frey et al. 1997)                                             |
| <i>Claudiosaurus</i>              | 24        | 8        | 53 (Carroll 1981)                                                 |
| <i>Acerosodontosaurus</i>         | 21        | ?        | 54 (Currie 1980)<br>53 (Carroll 1981); 55 (Currie and             |
| <i>Thadeosaurus</i>               | 25        | 6        | Carroll 1984)                                                     |
| <i>Kenyasaurus</i>                | 17        | ?        | 56 (Harris and Carroll 1977)                                      |
| <i>Hovasaurus</i>                 | 25        | 5        | 57 (Currie 1981)                                                  |
| <i>Tangasaurus</i>                | 25        | 7        | 58 (Currie 1982)                                                  |
| <br>                              |           |          |                                                                   |
| <b>Ichthyopterygia plus</b>       |           |          |                                                                   |
| <b>Hupehsuchus</b>                |           |          |                                                                   |
| <i>Hupehsuchus nanchangensis</i>  | 37        | 9        | 59 (Carroll and Dong 1991)                                        |
| <i>Utatusaurus hataii</i>         | 40        | ?        | 60 (Motani et al. 1998)                                           |
| <i>Qianichthysaurus zhoui</i>     | 44        | ?        | 61 (Nicholls et al. 2002)                                         |
| <i>Besanosaurus leptorhynchus</i> | 60        | 11       | 62 (Dal Sasso and Pinna 1996)<br>63 (Kosch 1990); 64 (McGowan and |
| <i>Shonisaurus popularis</i>      | 64        | 7        | Motani 1999)                                                      |
| <i>Guizhouichthysaurus tangae</i> | 69        | 6        | 65 (Chen and Cheng 2003)                                          |
| <i>Suevoleviathan disinteger</i>  | 44        | ?        | 66 (Maisch 1998)                                                  |

## Thalattosauriformes

|                      |          |        |                           |
|----------------------|----------|--------|---------------------------|
| <i>Askeptosaurus</i> | 38       | 13     | 67 (Müller 2005)          |
| <i>Anshunsaurus</i>  | 38       | 15     | 68 (Liu and Rieppel 2005) |
| <i>Endennasaurus</i> | 28       | 12     | 69 (Müller et al. 2005)   |
| <i>Clarazia</i>      | 30       | 7      | 70 (Rieppel 1987)         |
| <i>Hescheleria</i>   | 32       | 7 to 8 | 70 (Rieppel 1987)         |
| <i>Xinpusaurus</i>   | 33 to 40 | 4      | 71 (Jiang et al. 2004)    |

## Sauropterygia

| Taxon                                    | Presacral | Cervical | References                                                                              |
|------------------------------------------|-----------|----------|-----------------------------------------------------------------------------------------|
| <b>Sauropterygia, excl. Plesiosauria</b> |           |          |                                                                                         |
| <i>Placodus gigas</i>                    | 28        | 8        | 72 (Rieppel 2000)                                                                       |
| <i>Henodus chelyops</i>                  | 19        | 6        | 73 (Huene 1936); 74 (Pinna and Nosotti 1989)                                            |
| <i>Psephoderma alpinum</i>               | 20        | 5        | 74 (Pinna and Nosotti 1989)                                                             |
| <i>Keichousaurus hui</i>                 | 44        | 25.5     | 75 (Lin and Rieppel 1998)                                                               |
| <i>Anarosaurus pumilio</i>               | 45        | 19.5     | 76 (Rieppel and Lin 1995)                                                               |
| <i>Dactylosaurus gracilis</i>            | 36        | 17       | 76 (Rieppel and Lin 1995)                                                               |
| <i>Serpianosaurus mirigiolensis</i>      | 37.5      | 16       | 77 (Rieppel 1989)                                                                       |
| <i>Neusticosaurus pusillus</i>           | 42        | 19       | 78 (Sander 1989)                                                                        |
| <i>Neusticosaurus peyeri</i>             | 37        | 17.5     | 78 (Sander 1989)                                                                        |
| <i>Nothosaurus marchicus</i>             | 38        | 18.5     | 72 (Rieppel 2000)                                                                       |
| <i>Nothosaurus giganteus</i>             | 45        | 19       | 72 (Rieppel 2000)                                                                       |
| <i>Lariosaurus balsami</i>               | 44        | 21       | 72 (Rieppel 2000)                                                                       |
| <i>Lariosaurus xingyiensis</i>           | 43        | 19       | 79 (Rieppel et al. 2003)                                                                |
| <i>Ceresiosaurus calcagnii</i>           | 50        | 24       | 80 (Hänni 2004)                                                                         |
| <i>Ceresiosaurus lanzi</i>               | 47        | 23       | 80 (Hänni 2004)                                                                         |
| <i>Corosaurus alcovensis</i>             | 45        | 18       | 72 (Rieppel 2000); 81 (Rieppel et al. 2002)                                             |
| <b>PLESIOSAURIA</b>                      |           |          |                                                                                         |
| <i>Callawayasaurus columbiensis</i>      | 81        | 56       | 82 (Carpenter 1999); 83 (Welles 1962)                                                   |
| <i>Cryptoclidus eurymerus</i>            | 55        | 30.5     | 84 (Creisler 2003)<br>85 (Carpenter 1996); 84 (Creisler 2003); 86                       |
| <i>Dolichorhynchops osborni</i>          | 55.5      | 19       | (Hampe 1992)                                                                            |
| <i>Edgarosaurus muddi</i>                | ?         | 26       | 87 (Smith 2003), 84 (Creisler 2003)<br>82 (Carpenter 1999); 84 (Creisler 2003); 88, 89, |
| <i>Elasmosaurus platyurus</i>            | 97.5      | 71.5     | 90 (Welles 1949, 1952, 1970)<br>84 (Creisler 2003); (Welles 1952, Welles 1962,          |
| <i>Hydrotherosaurus alexandrae</i>       | 79        | 60       | Welles 1970)                                                                            |
| <i>Kronosaurus queenslandicus</i>        | 51        | 12       | 86 (Hampe 1992); 91 (Romer & Lewis 1959)<br>84 (Creisler 2003); 87 (Smith 2003); 92     |
| <i>Leptocleidus capensis</i>             | 38.5      | 18.5     | (Druckenmiller & Russel 2008)                                                           |
| <i>Leptocleidus superstes</i>            | ?         | 19       | 92 (Druckenmiller & Russel 2008)                                                        |
| <i>Libonectes morgani</i>                | ?         | 62       | 92 (Druckenmiller & Russel 2008)                                                        |
| <i>Liopleurodon ferox</i>                | ?         | 20       | 92 (Druckenmiller & Russel 2008)                                                        |
| <i>Muraenosaurus leedsi</i>              | 66        | 43.5     | 84 (Creisler 2003); 87 (Smith 2003)<br>84 (Creisler 2003); 87 (Smith 2003); 93 (Linder  |
| <i>Peloneusteus pilcharus</i>            | 45.5      | 20.5     | 1913)                                                                                   |
| <i>Plesiopterys wildi</i>                | 61        | 39       | 94 (O'Keefe 2001)                                                                       |
| <i>Plesiosaurus dolichodeirus</i>        | 65.5      | 40       | 95 (Storrs 1997)                                                                        |
| <i>Pliosaurus brachyspondylus</i>        | 36        | 15       | 92 (Druckenmiller & Russel 2008)                                                        |
| <i>Polycotylus latipinnis</i>            | 54        | 26       | 84 (Creisler 2003); 85 (Carpenter 1996)                                                 |
| <i>Rhomaleosaurus megacephalus</i>       | 58.5      | 28.5     | 84 (Creisler 2003)                                                                      |
| <i>Rhomaleosaurus victor</i>             | ?         | 27.5     | pers. obs. Ingmar Werneburg                                                             |
| <i>Simolestes vorax</i>                  | 51        | 20       | 92 (Druckenmiller & Russel 2008)                                                        |
| <i>Thalassiodracon hawkinski</i>         | ?         | 31.5     | 84 (Creisler 2003)                                                                      |

## Squamata, Rhynchocephalia, Choristodera, Prolacertiformes, Rhynchosauria and Testudinata

| Taxon                                        | Presacral | Cervical | References                                       |
|----------------------------------------------|-----------|----------|--------------------------------------------------|
| <b>Squamata</b>                              |           |          |                                                  |
| Gekkonidae                                   | 23        | 8        | 96 (Hoffstetter & Gasc 1969); J. Head pers. obs. |
| Xantusidae                                   | 26        | 8        | 96 (Hoffstetter & Gasc 1969); J. Head pers. obs. |
| Pygopodidae (limbless)                       | 74        | ?        | 96 (Hoffstetter & Gasc 1969); J. Head pers. obs. |
| Iguanidae                                    | 22        | 8        | 96 (Hoffstetter & Gasc 1969); J. Head pers. obs. |
| Agamidae                                     | 20        | ?        | 96 (Hoffstetter & Gasc 1969); J. Head pers. obs. |
| Chamaeleonidae                               | 16        | 5        | 96 (Hoffstetter & Gasc 1969); J. Head pers. obs. |
| Scincidae                                    | 26        | ?        | 96 (Hoffstetter & Gasc 1969); J. Head pers. obs. |
| Dibamidae (limbless)                         | 110       | 4        | 96 (Hoffstetter & Gasc 1969); J. Head pers. obs. |
| Cordylidae                                   | 24        | ?        | 96 (Hoffstetter & Gasc 1969); J. Head pers. obs. |
| <i>Chamaesaura</i> (limbless cordylid)       | 37        | 6        | 96 (Hoffstetter & Gasc 1969); J. Head pers. obs. |
| Gerrhosauridae                               | 27        | 8        | 96 (Hoffstetter & Gasc 1969); J. Head pers. obs. |
| <i>Tetradactylus</i> (limbless gerrhosaurid) | 31        | ?        | 96 (Hoffstetter & Gasc 1969); J. Head pers. obs. |
| Lacertidae                                   | 23        | 8        | 96 (Hoffstetter & Gasc 1969); J. Head pers. obs. |
| Teiidae                                      | 24        | 8        | 96 (Hoffstetter & Gasc 1969); J. Head pers. obs. |
| <i>Shinisaurus</i>                           | 26        | 8        | 96 (Hoffstetter & Gasc 1969); J. Head pers. obs. |
| <i>Xenosaurus</i>                            | 29        | 8        | 96 (Hoffstetter & Gasc 1969); J. Head pers. obs. |
| Anguidae                                     | 29        | 8        | 96 (Hoffstetter & Gasc 1969); J. Head pers. obs. |
| Limbless anguids                             | 51        | ?        | 96 (Hoffstetter & Gasc 1969); J. Head pers. obs. |
| Anniella                                     | 71        | ?        | 96 (Hoffstetter & Gasc 1969); J. Head pers. obs. |
| <i>Heloderma</i>                             | 33        | 8        | 96 (Hoffstetter & Gasc 1969); J. Head pers. obs. |
| <i>Lanthanotus</i>                           | 35        | 9        | 96 (Hoffstetter & Gasc 1969); J. Head pers. obs. |
| <i>Varanus</i>                               | 28        | 9        | 96 (Hoffstetter & Gasc 1969); J. Head pers. obs. |
| Amphisbaeania (limbless)                     | 82        | ?        | 96 (Hoffstetter & Gasc 1969); J. Head pers. obs. |
| <b>Rhynchocephalia</b>                       |           |          |                                                  |
| <i>Sphenodon</i>                             | 25        | 8        | pers. obs. JM                                    |
| <i>Pleurosaurus</i>                          | 37        | 7        | 97 (Carroll 1985)                                |
| <i>Palaeopleurosaurus</i>                    | 49        | 7        | 97 (Carroll 1985)                                |
| <i>Homeosaurus</i>                           | 24        | 7        | pers. obs. JM                                    |
| <i>Kallimodon</i>                            | 24        | 7        | pers. obs. JM                                    |
| <i>Sapheosaurus</i>                          | 24        | 7        | pers. obs. JM                                    |

**Choristodera**

|                                     |      |    |                                                                                            |
|-------------------------------------|------|----|--------------------------------------------------------------------------------------------|
| <i>Champsosaurus</i> spp.           | 26   | 9  | 98 (Brown 1905); 99 (Gao & Fox 1998)<br>100 (Gao et al. 2000); 101 (Matsumoto et al. 2007) |
| <i>Monjurosuchus splendens</i>      | 24   | 8  |                                                                                            |
| <i>Hyphalosaurus lingyuanensis</i>  | 35.5 | 19 | 102 (Gao et al. 1999)                                                                      |
| <i>Hyphalosaurus baitaigouensis</i> | 42.5 | 26 | 103 (Ji et al. 2006)                                                                       |
| <i>Philydrosaurus proseilus</i>     | 24   | ?  | 104 (Gao & Fox 2005)                                                                       |

**"Prolacertiformes"**

|                                     |      |    |                                   |
|-------------------------------------|------|----|-----------------------------------|
| <i>Dinocephalosaurus orientalis</i> | 53   | 27 | 105 (Rieppel et al. 2008)         |
| <i>Malerisaurus robinsonae</i>      | 25   | 9  | 106 (Chatterjee 1980)             |
| <i>Tanystropheus langobardicus</i>  | 25   | 12 | 107 (Peyer 1931), 108 (Wild 1974) |
| <i>Macrocnemus bassanii</i>         | 24   | 8  | 109 (Peyer 1937)                  |
| <i>Macrocnemus fuyuanensis</i>      | 25.5 | 8  | 110 (Li et al. 2007)              |

**Rhynchosauria**

|                               |    |   |                   |
|-------------------------------|----|---|-------------------|
| <i>Hyperodapedon gordonii</i> | 25 | ? | 111 (Benton 1983) |
| <i>Rhynchosaurus articeps</i> | 25 | 8 | 112 (Benton 1990) |
| <i>Mesosuchus browni</i>      | 25 | 8 | 113 (Dilkes 1998) |

**Testudinata**

|                                  |    |   |                      |
|----------------------------------|----|---|----------------------|
| <i>Odontochelys semitestacea</i> | 17 | 8 | 114 (Li et al. 2008) |
| <i>Proganochelys quenstedtii</i> | 18 | 8 | 115 (Gaffney 1990)   |
| <i>Emydura subglobosa</i>        | 18 | 8 | TMS pers. obs.       |
| <i>Podocnemis erythrocephala</i> | 18 | 8 | TMS pers. obs.       |
| <i>Testudo hermanni</i>          | 18 | 8 | TMS pers. obs.       |
| <i>Lissemys punctata</i>         | 18 | 8 | TMS pers. obs.       |
| <i>Apalone mutica</i>            | 18 | 8 | TMS pers. obs.       |
| <i>Pelodiscus sinensis</i>       | 18 | 8 | TMS pers. obs.       |

**Early Archosauriformes, Crocodylomorpha and Pterosauria**

| <b>Taxon</b>                     | <b>Presacral</b> | <b>Cervical</b> | <b>References</b>                                 |
|----------------------------------|------------------|-----------------|---------------------------------------------------|
| <b>Early Archosauriformes</b>    |                  |                 |                                                   |
| <i>Chasmatosaurus vanhoepeni</i> | 25               | 8               | 116 (Charig et al. 1976)                          |
| <i>Euparkeria capensis</i>       | 22               | 7               | 117 (Ewer 1965)                                   |
| <i>Parasuchus hislopi</i>        | 25               | 8               | 118 (Chatterjee 1978)                             |
| <i>Postosuchus kirkpatricki</i>  | 24               | 8               | 119 (Chatterjee 1985)                             |
| <i>Arizonasaurus babbitti</i>    | 23               | ?               | 120 (Nesbitt 2005)                                |
| <i>Yarasuchus deccanensis</i>    | 25               | 8               | 121 (Sen 2005)                                    |
| <i>Ornithosuchus longidens</i>   | 24               | ?               | 122 (Walker 1964)                                 |
| <i>Tikisuchus romeri</i>         | 25               | ?               | 123 (Chatterjee & Majumdar 1987)                  |
| <i>Ticinosuchus ferox</i>        | 24               | >6              | 124 (Krebs 1965)                                  |
| <i>Stagonolepis robertsoni</i>   | 24               | 8               | 125 (Walker 1961)                                 |
| <i>Scleromochlus taylori</i>     | 24.5             | 8               | 126. (Benton 1999)                                |
| <b>Crocodylomorpha</b>           |                  |                 |                                                   |
| <i>Protosuchus</i>               | 24               | 9               | 127 (Colbert and Mook 1951) and D. Pol pers. obs. |
| <i>Araripesuchus</i>             | 25               | 9               | D. Pol pers. obs.                                 |
| <i>Notosuchus</i>                | 29               | 10              | 128 (Pol 2005)                                    |
| <i>Pelagosaurus</i>              | 24               | 9               | 129 (Mueller-Töwe 2006)                           |
| <i>Geosaurus</i>                 | 23               | 9               | D. Pol pers. obs.                                 |
| <i>Steneosaurus</i>              | 22               | 9               | 129 (Mueller-Töwe 2006)                           |
| <i>Platysuchus</i>               | 26               | 9               | 129 (Mueller-Töwe 2006)                           |

|                                    |      |     |                                          |
|------------------------------------|------|-----|------------------------------------------|
| <i>Dyrosaurus</i>                  | 24   | 9   | 130 (Jouve et al. 2006)                  |
| <i>Hyposaurus</i>                  | 25   | 9   | 131 (Schwarz et al. 2006)                |
| <i>Isisfordia</i>                  | 24   | 9   | 132 (Salisbury et al. 2006)              |
| <i>Alligator</i>                   | 24   | 9   | D. Pol pers. obs.                        |
| <i>Crocodylus</i>                  | 24   | 9   | D. Pol pers. obs.                        |
| <i>Gavialis</i>                    | 24   | 9   | D. Pol pers. obs.                        |
| <b>Pterosauria</b>                 |      |     |                                          |
| <i>Anurognathus ammoni</i>         | 20   | 8.5 | 133 (Rjabinin 1948); 134 (Bennet 2008)   |
| <i>Jeholopterus ningchengensis</i> | 20   | 7.5 | 135 (Wang et al. 2002)                   |
| <i>Sordes pilosus</i>              | 24   | 8   | 136 (Sharov 1971); 137 (Wellnhofer 1978) |
| <i>Preondactylus buffarinii</i>    | 22   | 8   | 138 (Wild 1983)                          |
| <i>Scaphognathus crassirostris</i> | 23.5 | 8   | 139 (Wellnhofer 1975)                    |
| <i>Eudimorphodon ranzii</i>        | 22   | 8   | 140 (Wild 1978)                          |
| <i>Rhamphorhynchus</i> spp.        | 24   | 9   | 141 (Bennet 2001), 142 (Bennet 2004)     |
| <i>Pterorhynchus wellnhoferi</i>   | 19.5 | 7   | 143 (Czerkas and Ji 2002)                |
| <i>Pterodactylus antiquus</i>      | 21   | 7   | 141 (Bennet 2001)                        |
| <i>Germanodactylus cristatus</i>   | 20   | 7   | 144 (Wellnhofer 1970)                    |
| <i>Huanhepterus quingyangensis</i> | 18   | 7   | 145 (Dong 1982)                          |
| <i>Nyctosaurus gracilis</i>        | 21   | 9   | 141 (Bennet 2001)                        |
| <i>Pteranodon</i> spp.             | 21   | 9   | 141 (Bennet 2001)                        |
| <i>Anhanguera santanae</i>         | 22   | 9   | 146 (Veldmeijer 2003)                    |
| <i>Coloborhynchus spielbergi</i>   | 21   | 9   | 146 (Veldmeijer 2003)                    |

## Dinosauria, excluding Aves

| Taxon                                | Presacral | Cervical | References                                                     |
|--------------------------------------|-----------|----------|----------------------------------------------------------------|
| <b>DINOSAURIA, non Avian</b>         |           |          |                                                                |
| <i>Staurikosaurus pricei</i>         | 24        | ?        | 147 (Colbert 1970)                                             |
| <i>Coelophysis bauri</i>             | 23        | 10       | 148 (Colbert 1989)                                             |
| <i>Carnotaurus sastrei</i>           | 21        | 10       | 149 (Bonaparte et al. 1990)                                    |
| <i>Dilophosaurus' sinensis</i>       | 24        | 9        | 150 (Hu 1993)                                                  |
| <i>Dilophosaurus wetherilli</i>      | 24        | 9        | 151 (Welles 1984)                                              |
| <i>Spinostropheus gautieri</i>       | 23        | 10       | 152 (Serenio et al. 2004)                                      |
| <i>Majungasaurus crenatissimus</i>   | 23        | 10       | 153 (O'Connor 2007)                                            |
| <i>Szechuanosaurus' zigongensis</i>  | 23        | 10       | 154 (Gao 1993)                                                 |
| <i>Sinraptor dongi</i>               | 23        | 10       | 155 (Currie & Zhao 1993)                                       |
| <i>Sinraptor hepingensis</i>         | 23        | 9        | 156 (Gao 1999)                                                 |
| <i>Piatnitzkysaurus floresii</i>     | ?         | 9.5      | 157 (Bonaparte 1986)                                           |
| <i>Acrocanthosaurus atokensis</i>    | 23        | 10       | 158 (Harris 1998)                                              |
| <i>Allosaurus fragilis</i>           | 23        | 9        | 159 (Madsen 1976)                                              |
| <i>Monolophosaurus jiangi</i>        | 23        | 9        | 160 (Zhao & Currie 1993)                                       |
| <i>Eustreptospondylus oxoniensis</i> | 21        | 10       | 161 (Sadleir et al. 2008)<br>162 (Dal Sasso & Signore<br>1998) |
| <i>Scipionyx samniticus</i>          | 23        | 10       | 163 (Chen et al. 1998)                                         |
| <i>Sinosauropteryx prima</i>         | 23        | 10       | 164 (Hwang et al. 2004)                                        |
| <i>Huaxiagnathus orientalis</i>      | 23        | 10       | 165 (Ostrom 1978)                                              |
| <i>Compsognathus longipes</i>        | 23        | 10       | 166 (Lü 2003)                                                  |
| <i>Heyuannia huangi</i>              | 25        | 13       | 167 (Zhou et al. 2002)                                         |
| <i>Caudipteryx</i> sp.               | 21        | 12       | 168 (Burnham et al. 2000)                                      |
| <i>Bambiraptor feinbergi</i>         | 23        | 10       | 169 (Norell & Makovicky 2004)                                  |
| <i>Velociraptor mongoliensis</i>     | 21        | 9        | 170 (Kobayahshi & Lü 2003)                                     |
| <i>Sinornithomimus dongi</i>         | 22        | 10       | 171 (Osmólska et al. 1972)                                     |
| <i>Gallimimus bullatus</i>           | 23        | 10       | 172 (Osborn 1917)                                              |
| <i>Struthiomimus altus</i>           | 23        | 10       |                                                                |



|                                       |      |      |                                                                 |
|---------------------------------------|------|------|-----------------------------------------------------------------|
| <i>Neimongosaurus yangi</i>           | ?    | 13.5 | 173 (Zhang et al. 2001)                                         |
| <i>Nanshiungosaurus' bohlini</i>      | ?    | 11   | 174 (Dong & Yu 1997)                                            |
| <i>Tyrannosaurus rex</i>              | 23   | 9.5  | 175 (Brochu 2003)                                               |
| <i>Tarbosaurus bataar</i>             | 23   | 9.5  | 176 (Maleev 1974)                                               |
| <i>Gorgosaurus liberatus</i>          | ?    | ?    | 177 (Lambe 1914)                                                |
| <i>Efraasia minor</i>                 | 25.5 | 10   | 178 (Yates 2007)<br>179 (Galton and Upchurch 2004)              |
| <i>Plateosaurus</i>                   | 25   | 10   | Pol pers. obs.                                                  |
| <i>Massospondylus</i>                 | 25   | 10   | 178 (Yates 2007)                                                |
| <i>Lufengosaurus</i>                  | 25   | 10   | Pol pers. obs.                                                  |
| <i>Riojasaurus</i>                    | 24.5 | 9.5  | 178 (Yates 2007)                                                |
| <i>Jingshanosaurus</i>                | 25.5 | 10   | 178 (Yates 2007)                                                |
| <i>Melanorosaurus</i>                 | 25   | 9.5  | 178 (Yates 2007)                                                |
| <i>Shunosaurus</i>                    | 26   | 13   | 180 (Wilson and Sereno 1998)                                    |
| <i>Patagosaurus</i>                   | 25.5 | 13   | D. Pol pers. obs.                                               |
| <i>Cetiosaurus</i>                    | 25.5 | 13   | 181 (Upchurch et al. 2004)                                      |
| <i>Omeisaurus</i>                     | 28.5 | 16.5 | 181 (Upchurch et al. 2004)                                      |
| <i>Mamenchisaurus</i>                 | 30   | 18   | 182 (Wilson 2002)                                               |
| <i>Jobaria</i>                        | 25   | 13   | 182 (Wilson 2002)                                               |
| <i>Haplocantosaur</i>                 | 26   | 13   | 182 (Wilson 2002)                                               |
| <i>Dicraeosaurus</i>                  | 23   | 11   | 181 (Upchurch et al. 2004)                                      |
| <i>Amargasaurus</i>                   | 22.5 | 12   | 182 (Wilson 2002)                                               |
| <i>Diplodocus</i>                     | 25   | 15   | 181 (Upchurch et al. 2004)                                      |
| <i>Apatosaurus</i>                    | 25   | 15   | 181 (Upchurch et al. 2004)                                      |
| <i>Barosaurus</i>                     | 26   | 16   | 181 (Upchurch et al. 2004)                                      |
| <i>Camarasaurus</i>                   | 24   | 12   | 181 (Upchurch et al. 2004)                                      |
| <i>Brachiosaurus</i>                  | 25   | 13   | 182 (Wilson 2002)                                               |
| <i>Euhelopus</i>                      | 30   | 17   | 182 (Wilson 2002)                                               |
| <i>Titanosauria</i>                   | 25   | 14   | 180 (Wilson and Sereno 1998)                                    |
| <i>Heterodontosaurus tucki</i>        | 21   | 9    | 183 (Santa-Luca 1980)                                           |
| <i>Scelidosaurus harrisonii</i>       | ?    | ?    | 184 (Owen 1863)                                                 |
| <i>Scutellosaurus lawleri</i>         | 24   | 9    | 185 (Colbert 1981)                                              |
| <i>Huayangosaurus taibaii</i>         | 25   | 9    | 186 (Maidment et al. 2006)                                      |
| <i>Gigantspinosauros sichuanensis</i> | 24   | 8    | 187 (Peng et al. 2005)                                          |
| <i>Stegosaurus armatus</i>            | 26   | 11.5 | 188 (Gilmore 1914)                                              |
| <i>Stegosaurus mjosi</i>              | 24   | 13   | 189 (Carpenter et al. 2001)                                     |
| <i>Sauropelta edwardsorum</i>         | 20   | 8    | 190 (Parish 2005)                                               |
| <i>Tianzhenosaurus youngi</i>         | 21   | 8    | 191 (Pang & Cheng 1998)                                         |
| <i>Hylaeosaurus armatus</i>           | ?    | 8    | 192 (Pereda-Suberbiola 1993)                                    |
| <i>Saichania chulsanensis</i>         | ?    | 7    | 193 (Maryanska 1977)<br>194 (Carpenter 1982); 190 (Parish 2005) |
| <i>Euoplocephalus tutus</i>           | 16   | 7    | 195 (Godefroit et al. 1999)                                     |
| <i>Pinacosaurus mephistocephalus</i>  | ?    | 7.5  | 196 (Peng 1992)                                                 |
| <i>Agilisaurus louderbacki</i>        | 24   | 9    | 197 (He & Cai 1984)                                             |
| <i>Hexinlusaurus multidens</i>        | 24   | 9    | 198 (Scheetz 1999)                                              |
| <i>Orodromeus makelai</i>             | 24   | 9    | 199 (Galton 1974)                                               |
| <i>Hypsilophodon foxii</i>            | 24   | 9    | 200 (Novas et al. 2004)                                         |
| <i>Talenkauen santacrucensis</i>      | 24   | 9    | 201 (Galton 1981)                                               |
| <i>Dryosaurus lettowvorbecki</i>      | 24   | 12   | 202 (Forster 1990)                                              |
| <i>Tenontosaurus tilletti</i>         | 28   | 11   | 203 (You et al. 2003)                                           |
| <i>Equijubus normani</i>              | 28   | 14   | 204 (Taquet & Russell 1999)                                     |
| <i>Iguanodon bernissartensis</i>      | 28   | 11   | 205 (Norman 1980)                                               |
| <i>Mantellisaurus atherfieldensis</i> | 28   | 11   | 206 (Norman 1986)                                               |
| <i>Ouranosaurus nigeriensis</i>       | 28   | 11   | 207 (Taquet 1976)                                               |
| <i>Camptosaurus dispar</i>            | 25   | 9    | 208 (Gilmore 1909)                                              |

|                                     |    |    |                               |
|-------------------------------------|----|----|-------------------------------|
| <i>Camptosaurus prestwichii</i>     | 25 | 9  | 209 (Galton & Powell 1980)    |
| <i>Brachylophosaurus canadensis</i> | 31 | 13 | 210 (Prieto-Marquez 2007)     |
| <i>Edmontosaurus regalis</i>        | 31 | 13 | 211 (Lull & Wright 1942)      |
| <i>Edmontosaurus annectens</i>      | 32 | 13 | 211(Lull & Wright 1942)       |
| <i>Gyposaurus incurvimanus</i>      | 29 | 13 | 211 (Lull & Wright 1942)      |
| <i>Lambeosaurus lambei</i>          | 30 | 14 | 211 (Lull & Wright 1942)      |
| <i>Corythosaurus casuarius</i>      | 34 | 15 | 211 (Lull & Wright 1942)      |
| <i>Psittacosaurus mongoliensis</i>  | 21 | 8  | 212 (Sereno 1987)             |
| <i>Psittacosaurus sinensis</i>      | 22 | 9  | 212 (Sereno 1987)             |
| <i>Psittacosaurus xinjiangensis</i> | 21 | ?  | 213 (Sereno & Chao 1988)      |
| <i>Archaeoceratops oshimai</i>      | ?  | ?  | 214 (You & Dodson 2003)       |
| <i>Protoceratops andrewsi</i>       | 22 | 10 | 215 (Brown & Schlaikjer 1940) |
| <i>Montanoceratops cerorhynchus</i> | 22 | 10 | 216 (Brown & Schlaikjer 1942) |
| <i>Styracosaurus albertensis</i>    | 22 | 10 | 217 (Brown 1917)              |
| <i>Pentaceratops sternbergii</i>    | 21 | 10 | 218 (Wiman 1930)              |
| <i>Centrosaurus apertus</i>         | 21 | 10 | 219 (Lull 1933)               |

## Aves

| Taxon                        | Presacral | Cervical | References                  |
|------------------------------|-----------|----------|-----------------------------|
| <b>AVES</b>                  |           |          |                             |
| <i>Struthio</i>              | 25        | 17       | 220 (Livezey and Zusi 2006) |
| <i>Rhea</i>                  | 25        | 17       | 220 (Livezey and Zusi 2006) |
| <i>Casuarius</i>             | 25        | 17       | 220 (Livezey and Zusi 2006) |
| <i>Dromaius</i>              | 25        | 17       | 220 (Livezey and Zusi 2006) |
| <i>Apteryx</i>               | 25        | 17       | 220 (Livezey and Zusi 2006) |
| <i>Eudromia</i>              | 22        | 17       | 220 (Livezey and Zusi 2006) |
| <i>Chauna</i>                | 22        | 17       | 220 (Livezey and Zusi 2006) |
| <i>Anseranas</i>             | 22        | 17       | 220 (Livezey and Zusi 2006) |
| <i>Anser</i>                 | 22        | 17       | 220 (Livezey and Zusi 2006) |
| <i>Anas</i>                  | 20.5      | 15.5     | 220 (Livezey and Zusi 2006) |
| <i>Megapodius</i>            | 20.5      | 15.5     | 220 (Livezey and Zusi 2006) |
| <i>Ortalis</i>               | 20.5      | 15.5     | 220 (Livezey and Zusi 2006) |
| Phasianidae (7 Genera)       | 20.5      | 15.5     | 220 (Livezey and Zusi 2006) |
| <i>Numida</i>                | 20.5      | 15.5     | 220 (Livezey and Zusi 2006) |
| <i>Diomedea</i>              | 23.5      | 15.5     | 220 (Livezey and Zusi 2006) |
| <i>Puffinus</i>              | 23.5      | 15.5     | 220 (Livezey and Zusi 2006) |
| <i>Pachyptila</i>            | 20.5      | 15.5     | 220 (Livezey and Zusi 2006) |
| <i>Oceanites</i>             | 20.5      | 15.5     | 220 (Livezey and Zusi 2006) |
| <i>Pelecanoides</i>          | 20.5      | 15.5     | 220 (Livezey and Zusi 2006) |
| <i>Spheniscus</i>            | 23.5      | 15.5     | 220 (Livezey and Zusi 2006) |
| <i>Gavia</i>                 | 21.5      | 13.5     | 220 (Livezey and Zusi 2006) |
| <i>Podiceps</i>              | 22        | 17       | 220 (Livezey and Zusi 2006) |
| <i>Fregata</i>               | 20.5      | 15.5     | 220 (Livezey and Zusi 2006) |
| <i>Anhinga</i>               | 22        | 17       | 220 (Livezey and Zusi 2006) |
| <i>Phalacrocorax</i>         | 22        | 17       | 220 (Livezey and Zusi 2006) |
| <i>Sula</i>                  | 22        | 17       | 220 (Livezey and Zusi 2006) |
| <i>Pelecanus</i>             | 22        | 17       | 220 (Livezey and Zusi 2006) |
| <i>Phaethon</i>              | 20.5      | 15.5     | 220 (Livezey and Zusi 2006) |
| Ardeidae (5 Genera)          | 22        | 17       | 220 (Livezey and Zusi 2006) |
| Threskiornithidae (2 Genera) | 22        | 17       | 220 (Livezey and Zusi 2006) |
| <i>Scopus</i>                | 20.5      | 15.5     | 220 (Livezey and Zusi 2006) |
| <i>Ciconia</i>               | 22        | 17       | 220 (Livezey and Zusi 2006) |
| <i>Phoenicopterus</i>        | 22        | 17       | 220 (Livezey and Zusi 2006) |
| <i>Balaeniceps</i>           | 22        | 17       | 220 (Livezey and Zusi 2006) |

|                        |      |      |                             |
|------------------------|------|------|-----------------------------|
| <i>Accipiter</i>       | 18.5 | 13.5 | 220 (Livezey and Zusi 2006) |
| <i>Gyps</i>            | 22   | 17   | 220 (Livezey and Zusi 2006) |
| <i>Pandion</i>         | 20.5 | 15.5 | 220 (Livezey and Zusi 2006) |
| Falconidae (2 Genera)  | 20.5 | 15.5 | 220 (Livezey and Zusi 2006) |
| <i>Sagittarius</i>     | 20.5 | 15.5 | 220 (Livezey and Zusi 2006) |
| <i>Cathartes</i>       | 26.5 | 15.5 | 220 (Livezey and Zusi 2006) |
| <i>Turnix</i>          | 26.5 | 15.5 | 220 (Livezey and Zusi 2006) |
| <i>Mesitornis</i>      | 26.5 | 15.5 | 220 (Livezey and Zusi 2006) |
| <i>Afrotis</i>         | 28   | 17   | 220 (Livezey and Zusi 2006) |
| <i>Cariama</i>         | 20.5 | 15.5 | 220 (Livezey and Zusi 2006) |
| <i>Eurypyga</i>        | 28   | 17   | 220 (Livezey and Zusi 2006) |
| <i>Rhynchotos</i>      | 23.5 | 15.5 | 220 (Livezey and Zusi 2006) |
| <i>Psophia</i>         | 25   | 17   | 220 (Livezey and Zusi 2006) |
| <i>Aramus</i>          | 28   | 17   | 220 (Livezey and Zusi 2006) |
| <i>Grus</i>            | 25   | 17   | 220 (Livezey and Zusi 2006) |
| <i>Heliornis</i>       | 23.5 | 15.5 | 220 (Livezey and Zusi 2006) |
| <i>Porphyryla</i>      | 25   | 17   | 220 (Livezey and Zusi 2006) |
| <i>Pedionomus</i>      | 26.5 | 15.5 | 220 (Livezey and Zusi 2006) |
| <i>Jacana</i>          | 26.5 | 15.5 | 220 (Livezey and Zusi 2006) |
| <i>Rostratula</i>      | 23.5 | 15.5 | 220 (Livezey and Zusi 2006) |
| <i>Dromas</i>          | 26.5 | 15.5 | 220 (Livezey and Zusi 2006) |
| <i>Haematopus</i>      | 26.5 | 15.5 | 220 (Livezey and Zusi 2006) |
| <i>Ibidorhyncha</i>    | 26.5 | 15.5 | 220 (Livezey and Zusi 2006) |
| <i>Himantopus</i>      | 26.5 | 15.5 | 220 (Livezey and Zusi 2006) |
| <i>Cladorhynchus</i>   | 23.5 | 15.5 | 220 (Livezey and Zusi 2006) |
| <i>Burhinus</i>        | 26.5 | 15.5 | 220 (Livezey and Zusi 2006) |
| <i>Glareola</i>        | 23.5 | 15.5 | 220 (Livezey and Zusi 2006) |
| <i>Cursorius</i>       | 26.5 | 15.5 | 220 (Livezey and Zusi 2006) |
| <i>Pluvialis</i>       | 23.5 | 15.5 | 220 (Livezey and Zusi 2006) |
| <i>Chionis</i>         | 23.5 | 15.5 | 220 (Livezey and Zusi 2006) |
| <i>Heteroscelus</i>    | 23.5 | 15.5 | 220 (Livezey and Zusi 2006) |
| <i>Phalaropus</i>      | 23.5 | 15.5 | 220 (Livezey and Zusi 2006) |
| <i>Thinocorus</i>      | 23.5 | 15.5 | 220 (Livezey and Zusi 2006) |
| <i>Uria</i>            | 23.5 | 15.5 | 220 (Livezey and Zusi 2006) |
| <i>Stercorarius</i>    | 23.5 | 15.5 | 220 (Livezey and Zusi 2006) |
| <i>Rissa</i>           | 23.5 | 15.5 | 220 (Livezey and Zusi 2006) |
| <i>Chlidonias</i>      | 23.5 | 15.5 | 220 (Livezey and Zusi 2006) |
| <i>Rynchops</i>        | 26.5 | 15.5 | 220 (Livezey and Zusi 2006) |
| <i>Pterocles</i>       | 26.5 | 15.5 | 220 (Livezey and Zusi 2006) |
| Columbidae (2 Genera)  | 24.5 | 13.5 | 220 (Livezey and Zusi 2006) |
| Columbidae (2 Genera)  | 20.5 | 15.5 | 220 (Livezey and Zusi 2006) |
| Columbidae (2 Genera)  | 18.5 | 13.5 | 220 (Livezey and Zusi 2006) |
| <i>Trichoglossus</i>   | 24.5 | 13.5 | 220 (Livezey and Zusi 2006) |
| <i>Cacatua</i>         | 24.5 | 13.5 | 220 (Livezey and Zusi 2006) |
| Psittacidae (2 Genera) | 24.5 | 13.5 | 220 (Livezey and Zusi 2006) |
| Cuculidae (5 Genera)   | 24.5 | 13.5 | 220 (Livezey and Zusi 2006) |
| <i>Corythaixoides</i>  | 24.5 | 13.5 | 220 (Livezey and Zusi 2006) |
| <i>Opisthocomus</i>    | 26.5 | 15.5 | 220 (Livezey and Zusi 2006) |
| Tytonidae (2 Genera)   | 20.5 | 15.5 | 220 (Livezey and Zusi 2006) |
| Strigidae (2 Genera)   | 18.5 | 13.5 | 220 (Livezey and Zusi 2006) |
| <i>Steatornis</i>      | 26.5 | 15.5 | 220 (Livezey and Zusi 2006) |
| <i>Podargus</i>        | 24.5 | 13.5 | 220 (Livezey and Zusi 2006) |
| <i>Nyctibius</i>       | 24.5 | 13.5 | 220 (Livezey and Zusi 2006) |
| <i>Aegotheles</i>      | 24.5 | 13.5 | 220 (Livezey and Zusi 2006) |
| <i>Caprimulgus</i>     | 24.5 | 13.5 | 220 (Livezey and Zusi 2006) |
| <i>Hemiprocne</i>      | 24.5 | 13.5 | 220 (Livezey and Zusi 2006) |

|                        |      |      |                             |
|------------------------|------|------|-----------------------------|
| Apodidae (2 Genera)    | 24.5 | 13.5 | 220 (Livezey and Zusi 2006) |
| <i>Glaucis</i>         | 24.5 | 13.5 | 220 (Livezey and Zusi 2006) |
| <i>Colius</i>          | 24.5 | 13.5 | 220 (Livezey and Zusi 2006) |
| Trogonidae (2 Genera)  | 24.5 | 13.5 | 220 (Livezey and Zusi 2006) |
| Alcedinidae (2 Genera) | 24.5 | 13.5 | 220 (Livezey and Zusi 2006) |
| <i>Todus</i>           | 26.5 | 15.5 | 220 (Livezey and Zusi 2006) |
| <i>Momotus</i>         | 26.5 | 15.5 | 220 (Livezey and Zusi 2006) |
| <i>Merops</i>          | 24.5 | 13.5 | 220 (Livezey and Zusi 2006) |
| <i>Coracias</i>        | 24.5 | 13.5 | 220 (Livezey and Zusi 2006) |

## 2. Reconstructed values and CP ratio for selected taxa and nodes

| Taxon                  | Presacral no. | Cervical no. | CP ratio    |
|------------------------|---------------|--------------|-------------|
| Cotylosauria           | 25.79         | 5.86         | 0.227219853 |
| Diadectidae            | 24.74         | 6            | 0.242522231 |
| Limnoscelidae          | 26            | 5            | 0.192307692 |
| Amniota                | 26.07         | 6.1          | 0.233985424 |
| Reptilia               | 26.68         | 6.49         | 0.243253373 |
| Parareptilia           | 26.27         | 7.8          | 0.296916635 |
| Mesosauridae           | 28.43         | 10.27        | 0.361238129 |
| Millerettidae          | 23.82         | 4            | 0.167926113 |
| <i>Eunotosaurus</i>    | 15            | 5            | 0.333333333 |
| Bolosauridae           | 24.6          | 5.5          | 0.223577236 |
| Nyctiphruetus          | 24            | 8            | 0.333333333 |
| <i>Macroleter</i>      | 23            | 4.5          | 0.195652174 |
| Procolophonoidea       | 25.79         | 6.77         | 0.262504847 |
| Pareiasauria           | 20.96         | 5            | 0.238549618 |
| Eureptilia             | 27.69         | 5.56         | 0.200794511 |
| <i>Coelostegus</i>     | 29            | 5            | 0.172413793 |
| <i>Brouffia</i>        | 31            | 4            | 0.129032258 |
| <i>Cephalerpeton</i>   | 28            | 5            | 0.178571429 |
| <i>Hylonomus</i>       | 26            | 5            | 0.192307692 |
| <i>Paleothyris</i>     | 32            | 4            | 0.125       |
| <i>Protorothyris</i>   | 23            | 5            | 0.217391304 |
| <i>Anthracodromeus</i> | 32            | 4            | 0.125       |
| Captorhinidae          | 25.48         | 5            | 0.196232339 |
| <i>Thuringothyris</i>  | 26            | 5.5          | 0.211538462 |
| Diapsida               | 26.4          | 6.06         | 0.229545455 |
| Areoscelidia           | 25.61         | 7.01         | 0.273721203 |
| "Younginiiformes"      | 24.78         | 5.77         | 0.232849072 |
| <i>Claudiosaurus</i>   | 24            | 8            | 0.333333333 |
| <i>Coelurosauravus</i> | 21            | 8            | 0.380952381 |
| <i>Palaeagama</i>      | 23            | 6.5          | 0.282608696 |
| Drepanosauridae        | 24            | 8            | 0.333333333 |
| Kuehneosauridae        | 26            | 7            | 0.269230769 |
| <i>Hupehsuchus</i>     | 37            | 9            | 0.243243243 |
| Ichthyopterygia        | 41.46         | 10           | 0.241196334 |
| Thalattosauriformes    | 33.15         | 9.05         | 0.273001508 |
| Lepidosauromorpha      | 40.5          | 10.8         | 0.266666667 |
| Sauropterygia          | 37.07         | 12.77        | 0.34448341  |
| Eosauropterygia        | 38.8          | 18.34        | 0.472680412 |
| Placodontia            | 28.9          | 9.16         | 0.316955017 |
| <i>Placodus</i>        | 28            | 8            | 0.285714286 |
| <i>Henodus</i>         | 19            | 6            | 0.315789474 |
| <i>Psephoderma</i>     | 20            | 5            | 0.25        |
| Lepidosauria           | 52.38         | 8.21         | 0.156739213 |

|                          |       |       |             |
|--------------------------|-------|-------|-------------|
| Squamata                 | 77.33 | 6.33  | 0.081856977 |
| Rhynchocephalia          | 39.3  | 7.5   | 0.190839695 |
| Sphenodontidae           | 25.95 | 7.22  | 0.27822736  |
| Pleurosauridae           | 39.59 | 7.05  | 0.178075272 |
| Choristodera             | 27.55 | 12.07 | 0.438112523 |
| Archosauromorpha         | 31.19 | 12.92 | 0.414235332 |
| Testudinata              | 18    | 8     | 0.444444444 |
| <i>Tanystropheus</i>     | 25    | 12    | 0.48        |
| <i>Macrocnemus</i>       | 25.54 | 8     | 0.313234143 |
| <i>Protorosaurus</i>     | 26    | 8     | 0.307692308 |
| <i>Prolacerta</i>        | 26    | 8     | 0.307692308 |
| <i>Dinocephalosaurus</i> | 53    | 27    | 0.509433962 |
| <i>Malerisaurus</i>      | 23    | 9     | 0.391304348 |
| Rhynchosauria            | 25.12 | 7.9   | 0.314490446 |
| Archosauriformes         | 23.29 | 7.63  | 0.327608416 |
| <i>Euparkeria</i>        | 22    | 7     | 0.318181818 |
| <i>Chasmatosaurus</i>    | 25    | 8     | 0.32        |
| Crurotarsi               | 23.84 | 8.15  | 0.341862416 |
| Aetosauridae             | 24    | 8     | 0.333333333 |
| <i>Parasuchus</i>        | 25    | 8     | 0.32        |
| <i>Postosuchus</i>       | 24    | 8     | 0.333333333 |
| Crocodylomorpha          | 25.09 | 8.75  | 0.34874452  |
| Ornithodira              | 22.7  | 8.39  | 0.369603524 |
| Pterosauria              | 21.64 | 7.99  | 0.36922366  |
| Ornithischia             | 22.39 | 9.12  | 0.407324699 |
| Saurischia               | 23.6  | 9.55  | 0.404661017 |
| Sauropodomorpha          | 24.74 | 9.84  | 0.397736459 |
| Theropoda                | 23.2  | 9.8   | 0.422413793 |
| Neoceratosauria          | 22.8  | 9.86  | 0.43245614  |
| Coelophysis              | 23    | 10    | 0.434782609 |
| Carnosauria              | 22.93 | 9.42  | 0.410815526 |
| Tyrannosauroidea         | 22.96 | 9.61  | 0.418554007 |
| Compsognathidae          | 22.96 | 10.05 | 0.43771777  |
| Aves                     | 23    | 14.82 | 0.644347826 |
| Neognathae               | 22.87 | 15.95 | 0.697420201 |
| Palaeognathae            | 23.08 | 16.75 | 0.725736568 |
| Synapsida                | 25.74 | 5.96  | 0.231546232 |
| Caseidae                 | 25.42 | 5.95  | 0.234067663 |
| Varanopidae              | 26    | 5.5   | 0.211538462 |
| <i>Haptodus</i>          | 27    | 5.5   | 0.203703704 |
| Therapsida               | 27.52 | 6.75  | 0.245276163 |
| Biarmosuchia             | 28    | 7     | 0.25        |
| Gorgonopsia              | 26.73 | 6.95  | 0.260007482 |
| Dicynodontia             | 26.6  | 6.2   | 0.233082707 |
| Dinocephalia             | 29    | 8     | 0.275862069 |
| Therocephalia            | 27.33 | 6.59  | 0.241126967 |
| Thrinaxodontidae         | 26.49 | 6.09  | 0.229898075 |
| Cynognathidae            | 29    | 7     | 0.24137931  |
| Traversodontidae         | 26    | 7     | 0.269230769 |
| Monotremata              | 26    | 7     | 0.269230769 |
| Marsupialia              | 26    | 7     | 0.269230769 |
| Eutheria                 | 26    | 7     | 0.269230769 |

### 3. Source of phylogenetic framework for the clades examined

**Diadectomorpha:** Phylogeny was taken from (37) Berman et al. (2004) and (44) Carroll (1969).

**Synapsida:** To map the vertebral counts, we created an informal super-tree (a composite phylogeny) following works which do not present totally congruent phylogenies but which complement themselves. They are, for the general outline: (221) Sidor (2003) and (222) Kemp (2005) and for specific clades (223) Frobisch (2007) and most importantly the unpublished hypotheses and revisions kindly provided to us by Dr. F. Abdala (Johannesburg). Data are taken from several sources, as indicated. In cases in which different numbers are reported in the literature, we used the one reported in the most recent reference. In cases a range is given, we use the average. It may appear that many more taxa should be in this analysis, but many of the mounted skeletons of even familiar taxa are reconstructions for which the number of vertebrae is not reliable then. For example, (9) Govender et al. (2002), in their study of the exceptional dinocephalian *Tapinocaninus*, stated: 'The only other tapinocephalid with a relatively complete postcranial skeleton is a mounted specimen of *Moschops* (AMNH 5552)...that specimen has been *reconstructed* (italics added) as having a vertebral column consisting of 6 or 7 cervical vertebrae, 21 or 22 dorsal and lumbar vertebrae, 3 sacral vertebrae, and of the 29 caudal vertebrae only five are genuine.' The plesiomorphic numbers of the three major living groups of Mammalia were based on the survey conducted by (24) Sánchez-Villagra et al. (2007).

**Parareptilia:** the tree is based on (224) Müller and Tsuji (2007).

**Early Eureptilia and Diapsida:** The tree topology was generated based on the information from (225, 226) Müller (2003, 2004) and (227) Müller and Reisz (2006)

**Hupehsuchus and Ichthyopterygia:** The tree topology is based on (233) Motani 1999, supplemented with *Quianichthysaurus zhoui* and *Guizhouichthysaurus tangae* following (234) Maisch and Matzke (2000) and (235) Maisch et al. (2006), whereas *Aegirosaurus leptospondylus* was added following (236) Fernández (2007).

**Thalattosauriformes:** The tree topology is based on the phylogenetic studies by (67, 228) Müller (2005, 2007).

**Sauropterygia (without Plesiosauria):** The tree topology is based on (72) Rieppel (2000), with the placodont topology taken from (75) Rieppel (2001). The relationships of the *Ceresiosaurus-Lariosaurus* clade follow (80) Hänni (2004).

**Plesiosauria:** The plesiosaur tree topology was based on the competing phylogenetic hypotheses of (94) O'Keefe (2001) and (92) Druckenmiller and Russell (2008), which means that two different topologies were generated, including only the taxa that are present in both phylogenetic studies and for which information on the complete presacral counts was available. These topologies were then combined with

that of the remaining sauropterygians. No matter what phylogeny was used, the ancestral values for Plesiosauria remained the same.

**Squamata:** The sources of phylogenetic framework were (229) Vidal and Hedges (2002) and (230) Townsend et al. (2004).

**Rhynchocephalia:** The tree topology is based on the study by (231) Reynoso (2005).

**Testudinata:** The tree topology was modified following (238) Gaffney and Meylan (1988), (239) Joyce et al. (2004), and (114) Li et al. (2008).

**Choristodera/Archosauromorpha:** General tree topology based on (240) Benton (2007), with modifications following (113) Dilkes (1998; Rhynchosauria, “Prolacertiformes”), (101) Matsumoto et al. (2007; Choristodera), and (241) Irmis et al. (2007).

**Crocodylomorpha:** The Crocodylomorpha tree is based on (232) Gasparini et al. (2006) and (132) Salisbury et al. (2006)

**Pterosauria:** Tree topology follows (242) Wang et al. (2008) and (243) Andres and Ji (2008), with data added from (143) Czerkas and Ji (2002) on *Pterorhynchus wellnhoferi*, as well as data from (146) Veldmeijer (2003) added for *Coloborhynchus spielbergi*.

**Dinosauria:** The dinosaur tree topology follows (244) Barrett et al. 2009 and other references (245-255).

**Aves:** The information for Aves is based for the most part on (220) Livezey and Zusi (2006). Given the great diversity within Aves, a subject of research in itself, the individual counts were best lumped into ranges, for which an average was calculated, this way also masking some of the individual variation which exists. Potential differences among authors in birds' vertebral counts are often due to the definition of cervical vs. thoracic vertebrae. The first thoracic vertebra is that which has a complete rib (with both a vertebral and a sternal segment) and that articulates with the sternum. In birds there are often transitional vertebrae between the cervical and thoracic regions. These vertebrae, which have ribs that do not articulate with the sternum and sometimes are called vertebrae cervicodorsales, are counted as cervicals by Livezey and Zusi.

#### 4. Tree topologies used

Amniota overall

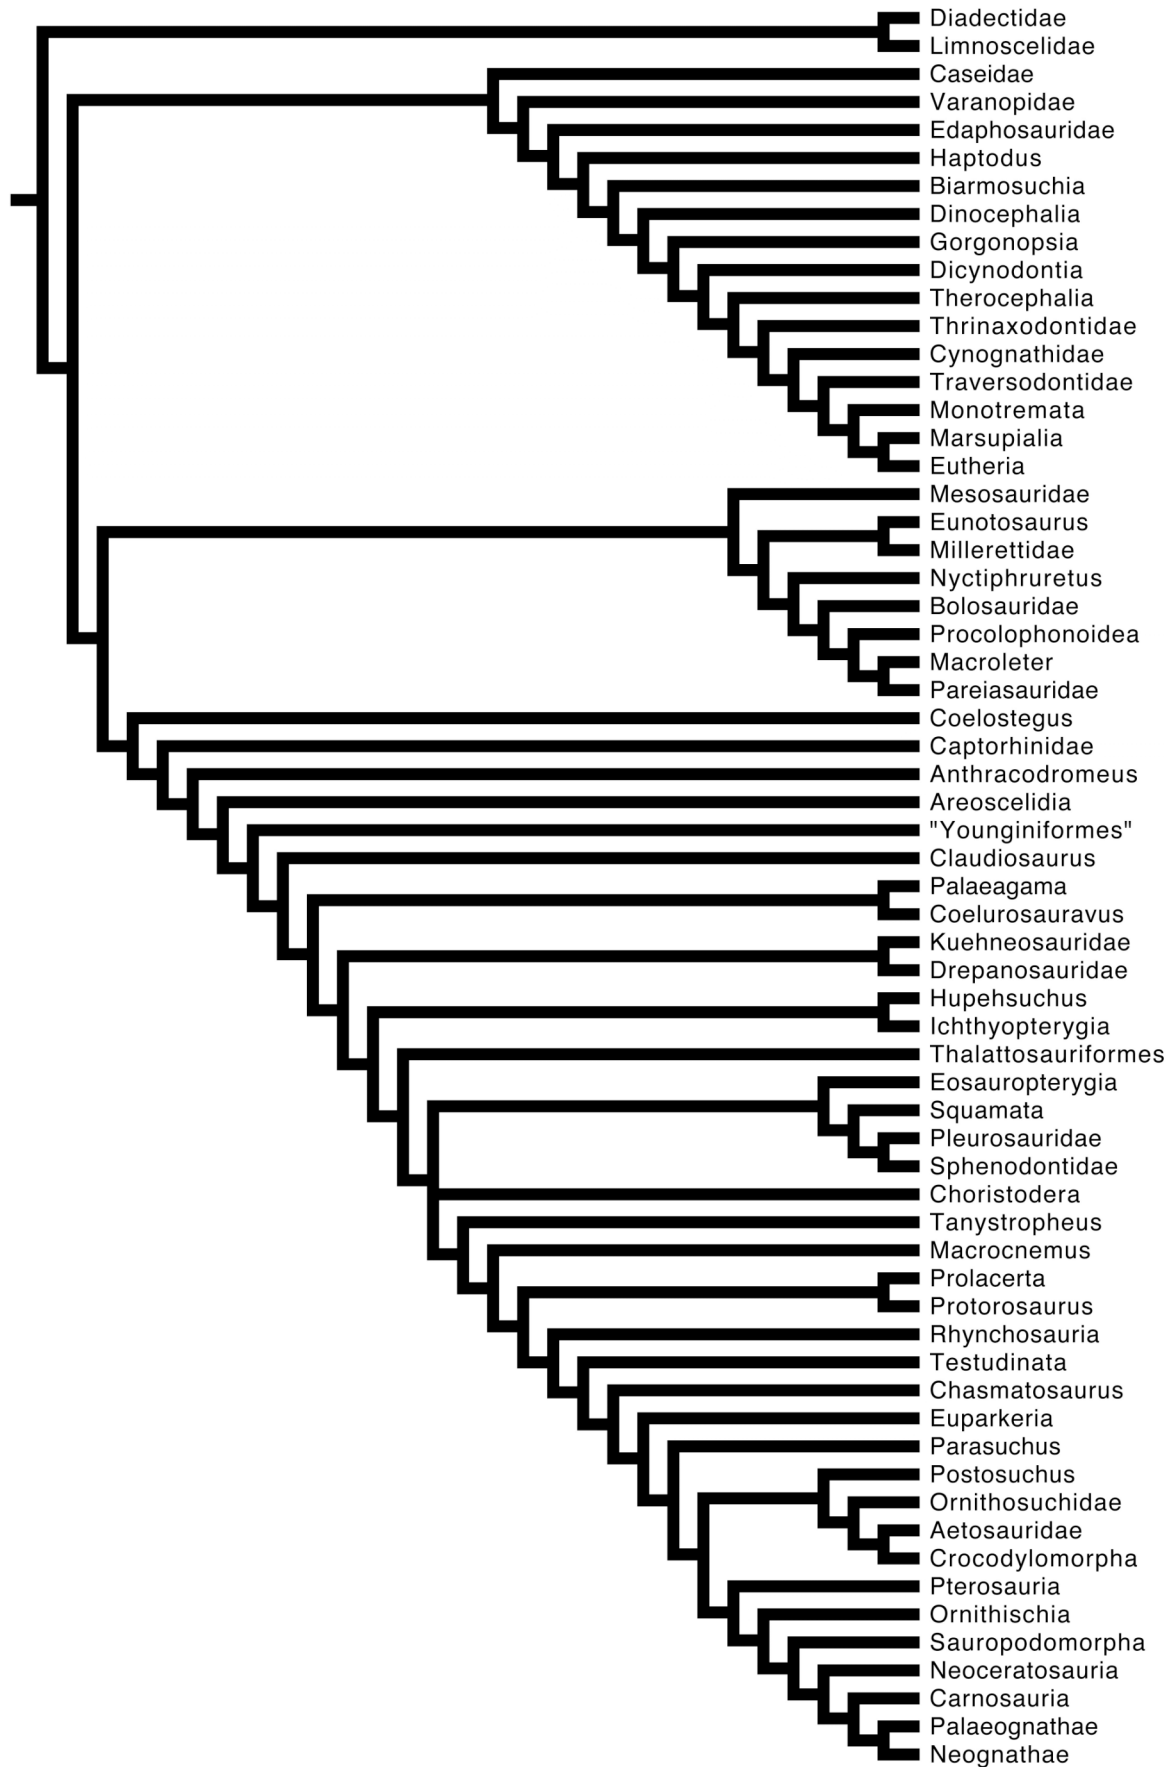



Synapsida

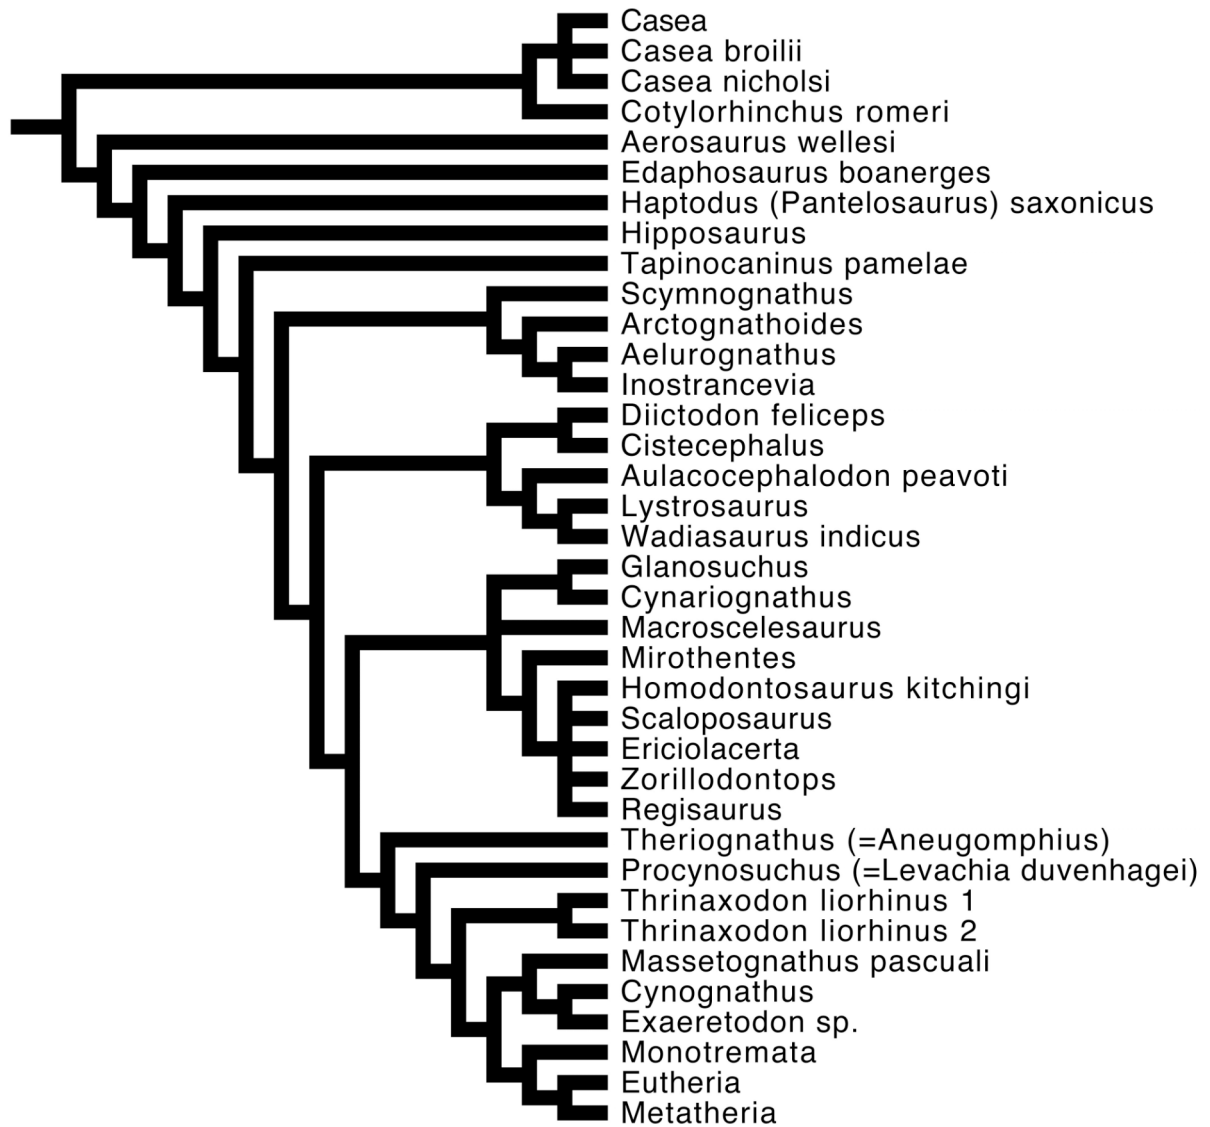

## Basal Reptilia

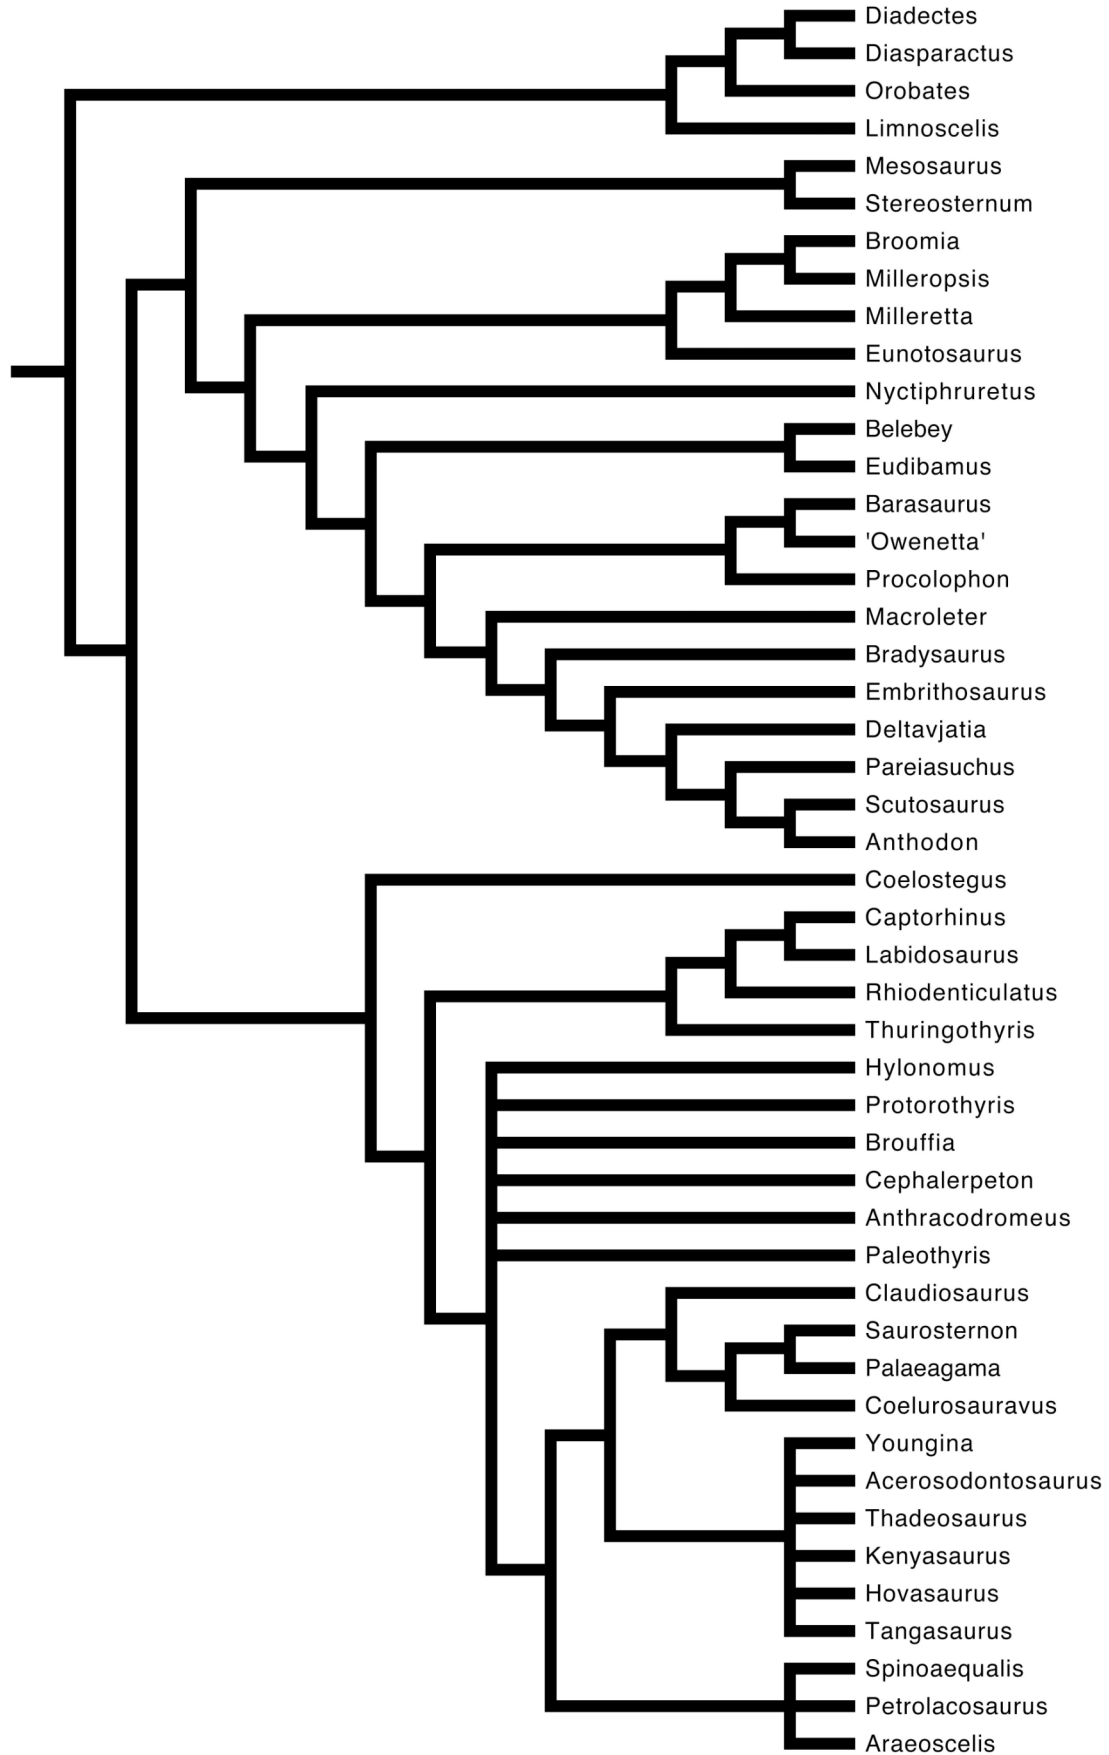

*Hupehsuchus/Ichthyopterygia*

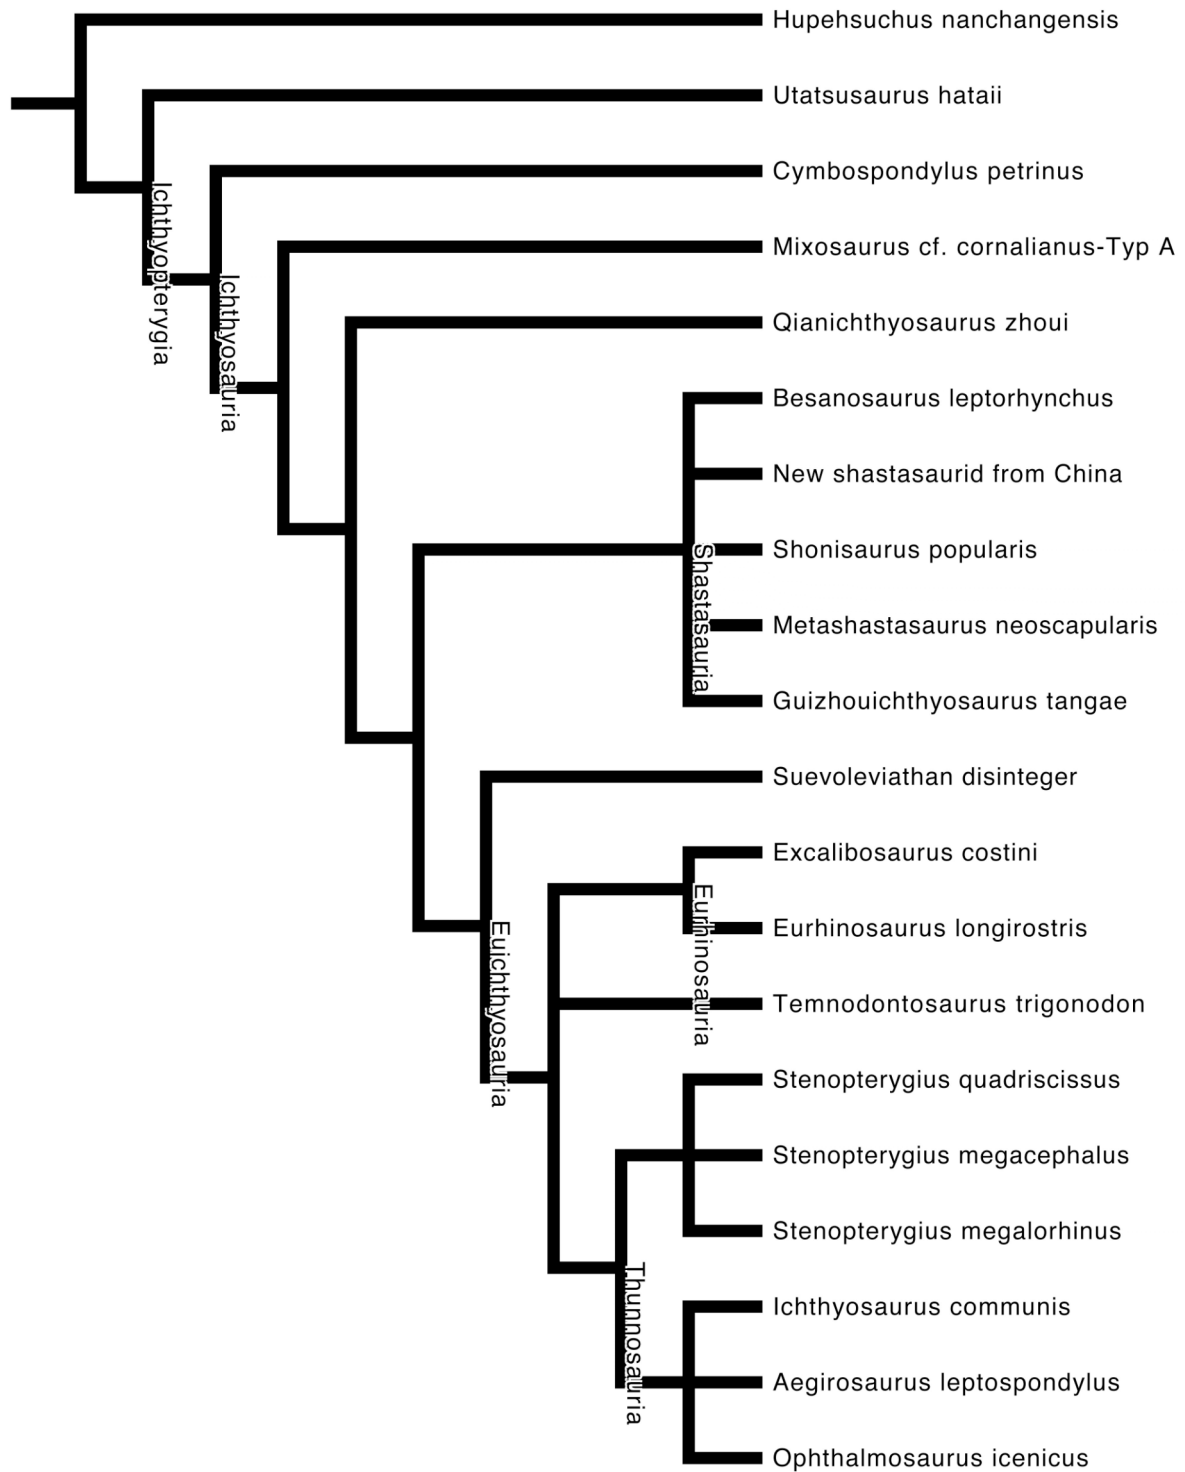

Sauropterygia with plesiosaurs according to (92) Druckenmiller and Russel

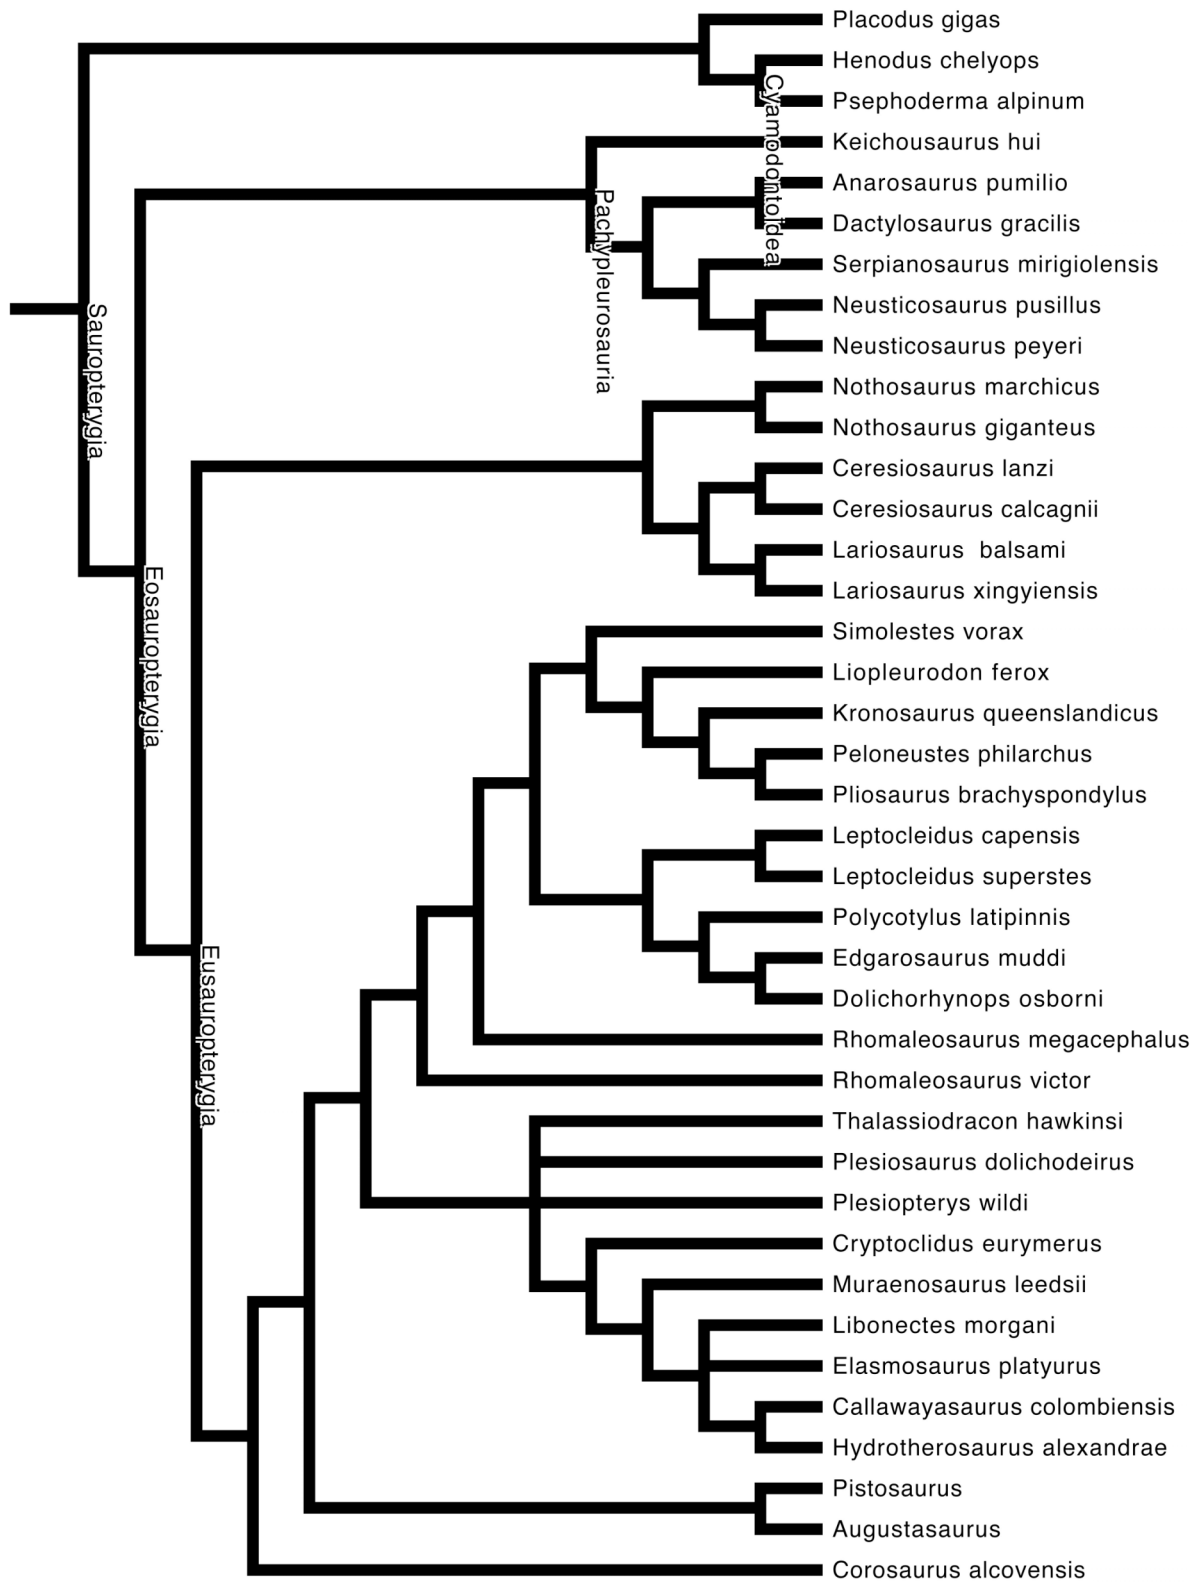

Sauropterygia with plesiosaurs according to (94) O'Keefe

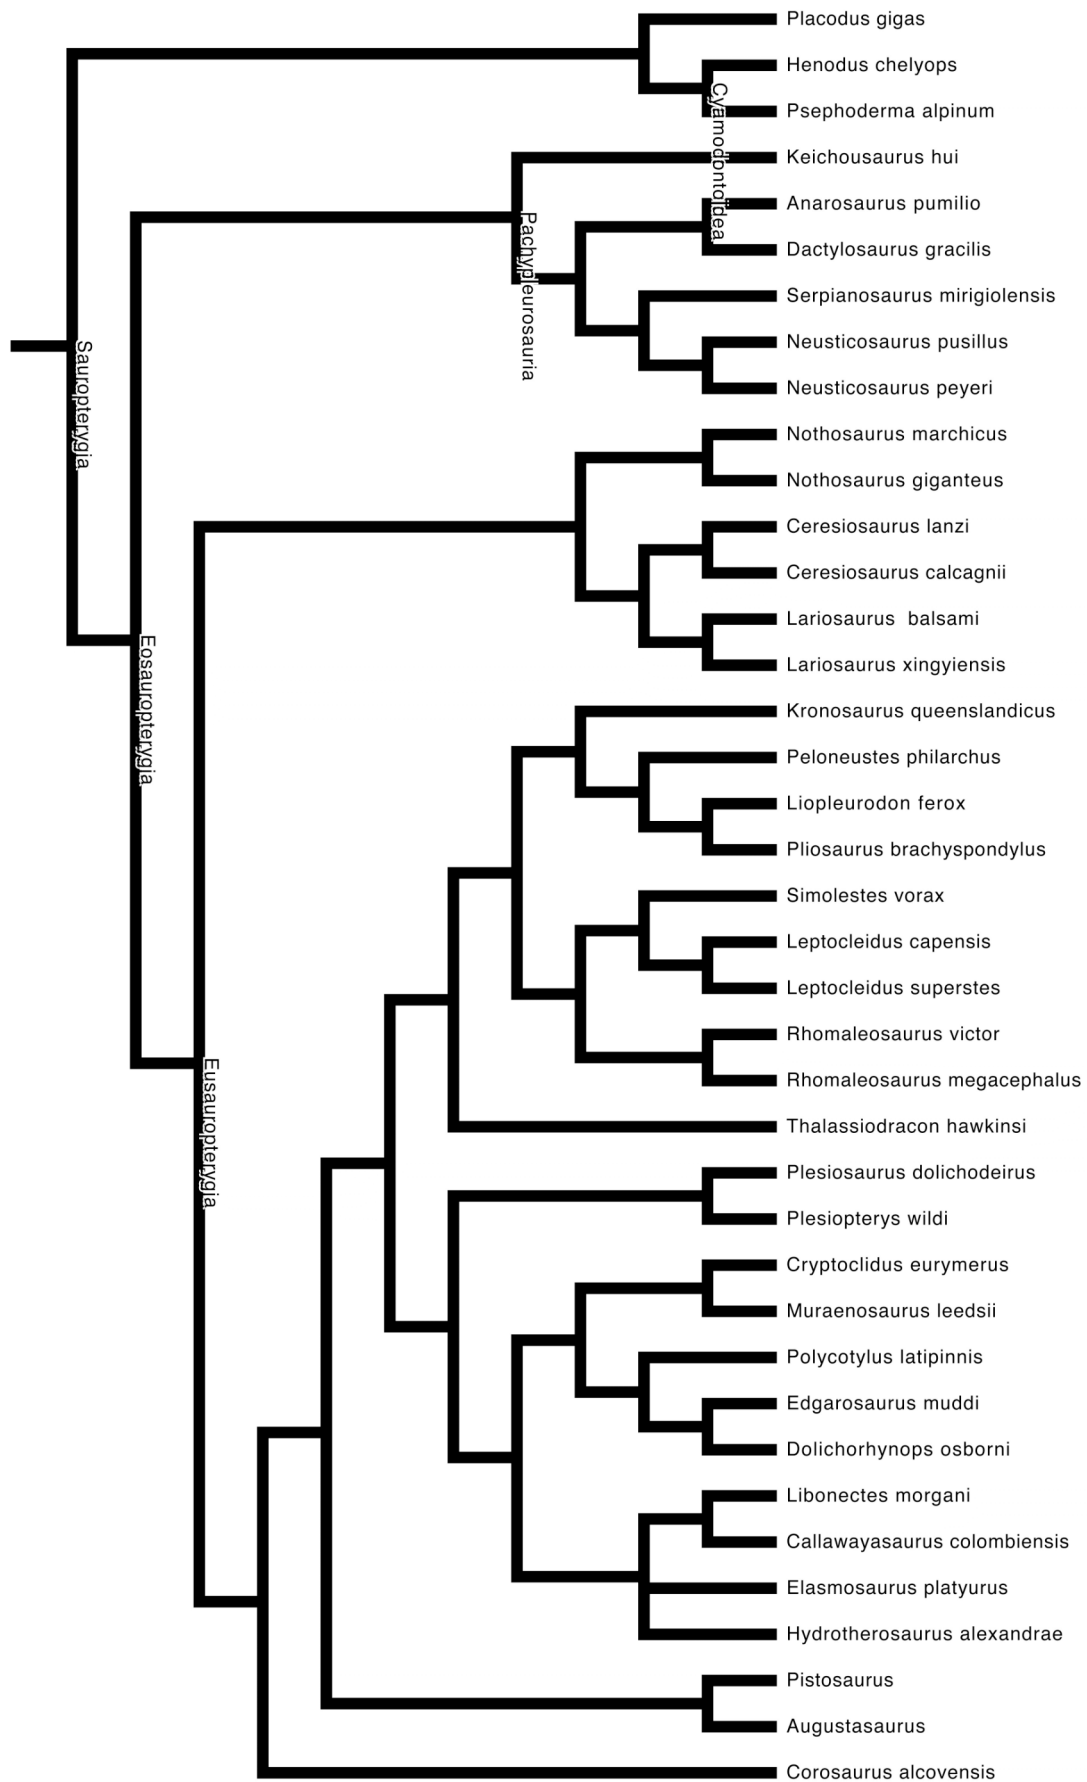

### Thalattosauriformes

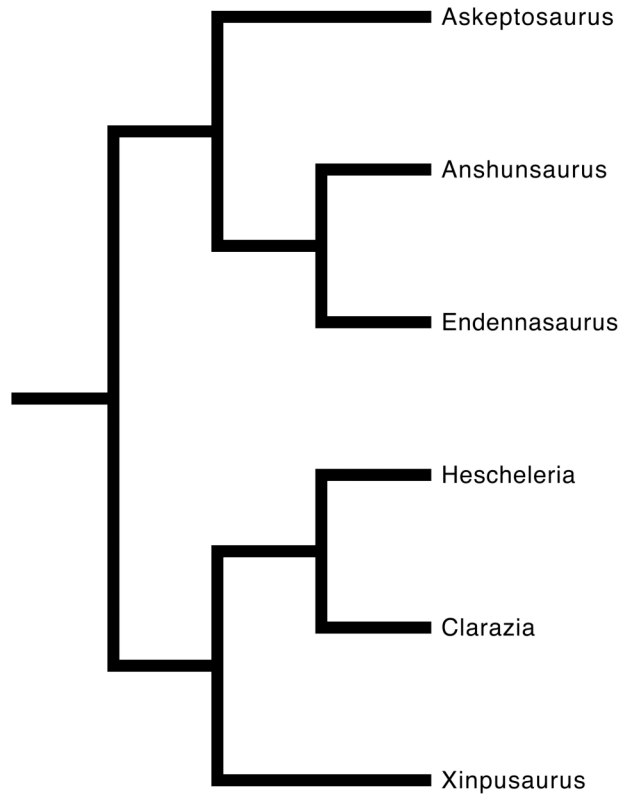

### Rhynchocephalia

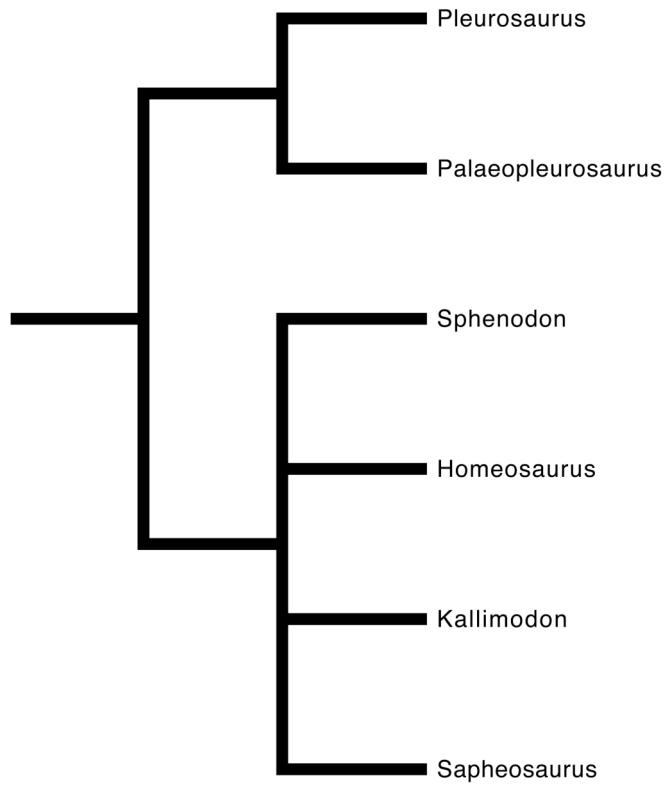

# Squamata

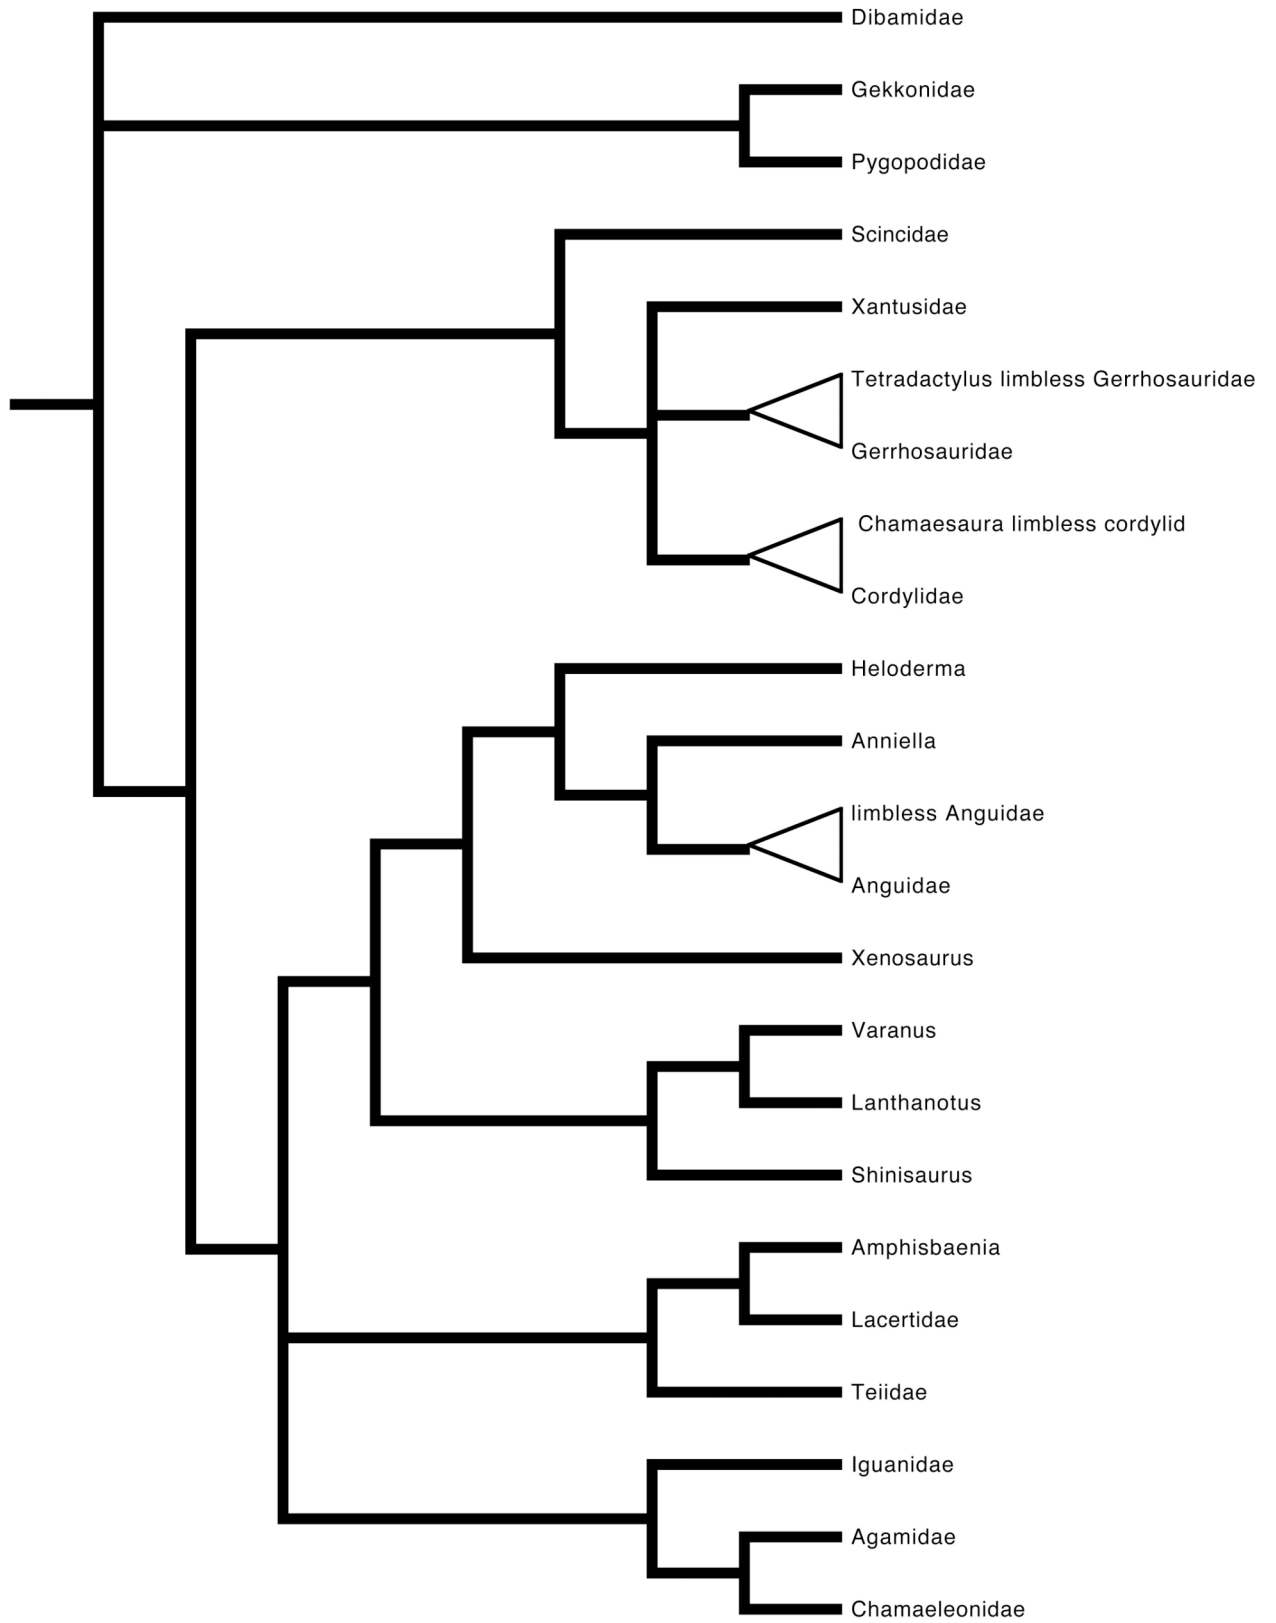

Serpentes

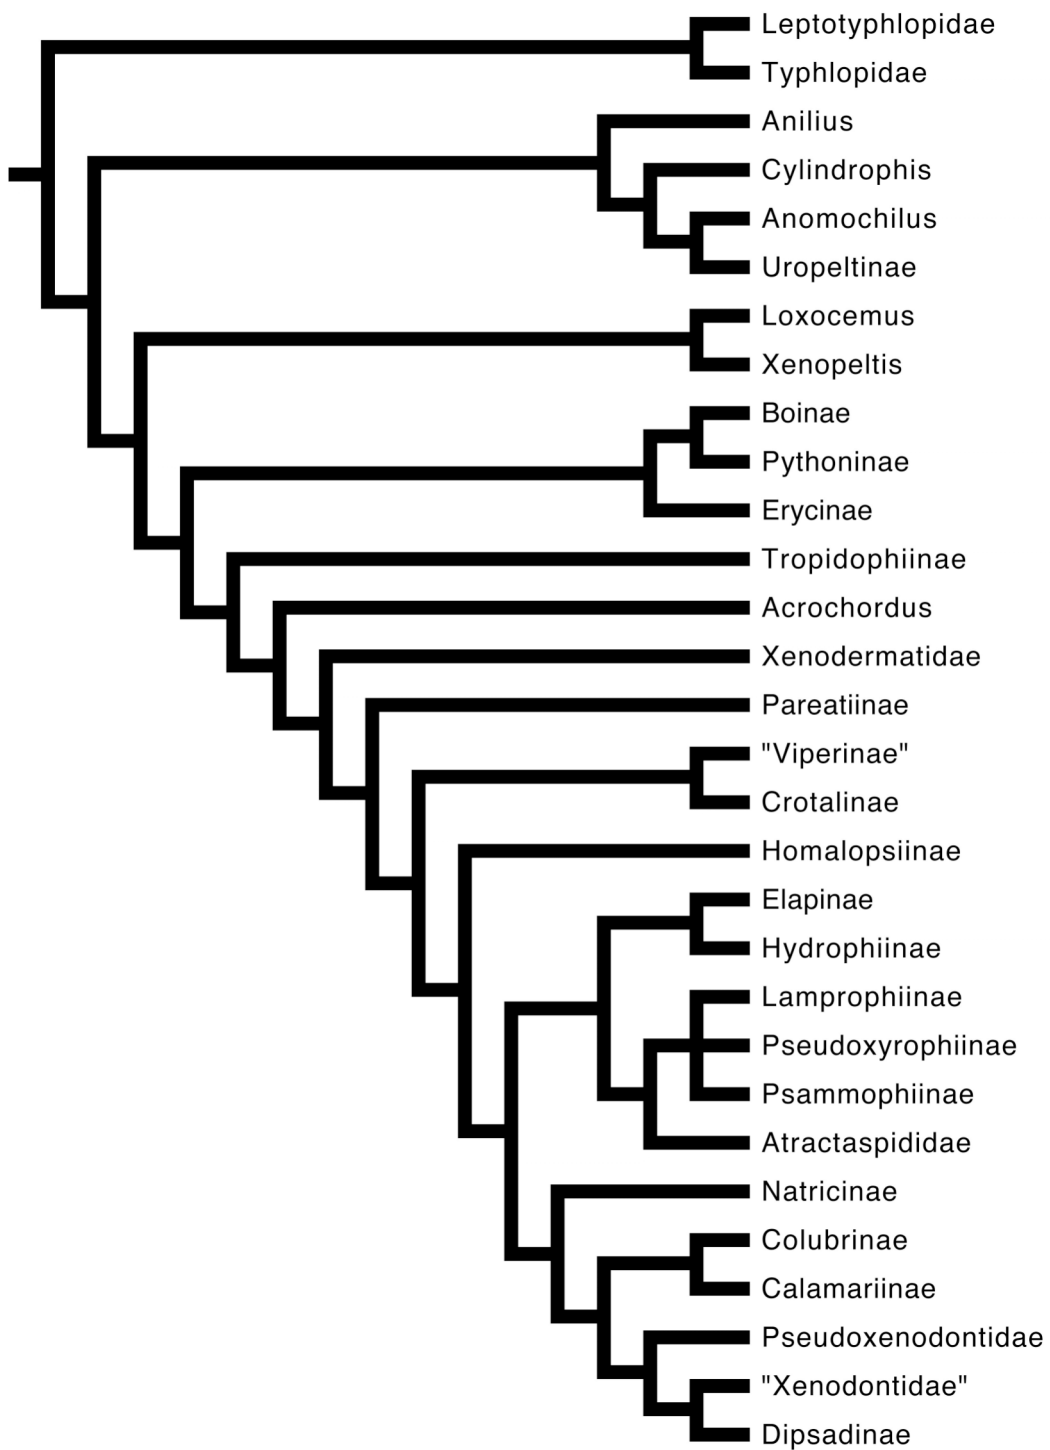



Testudinata

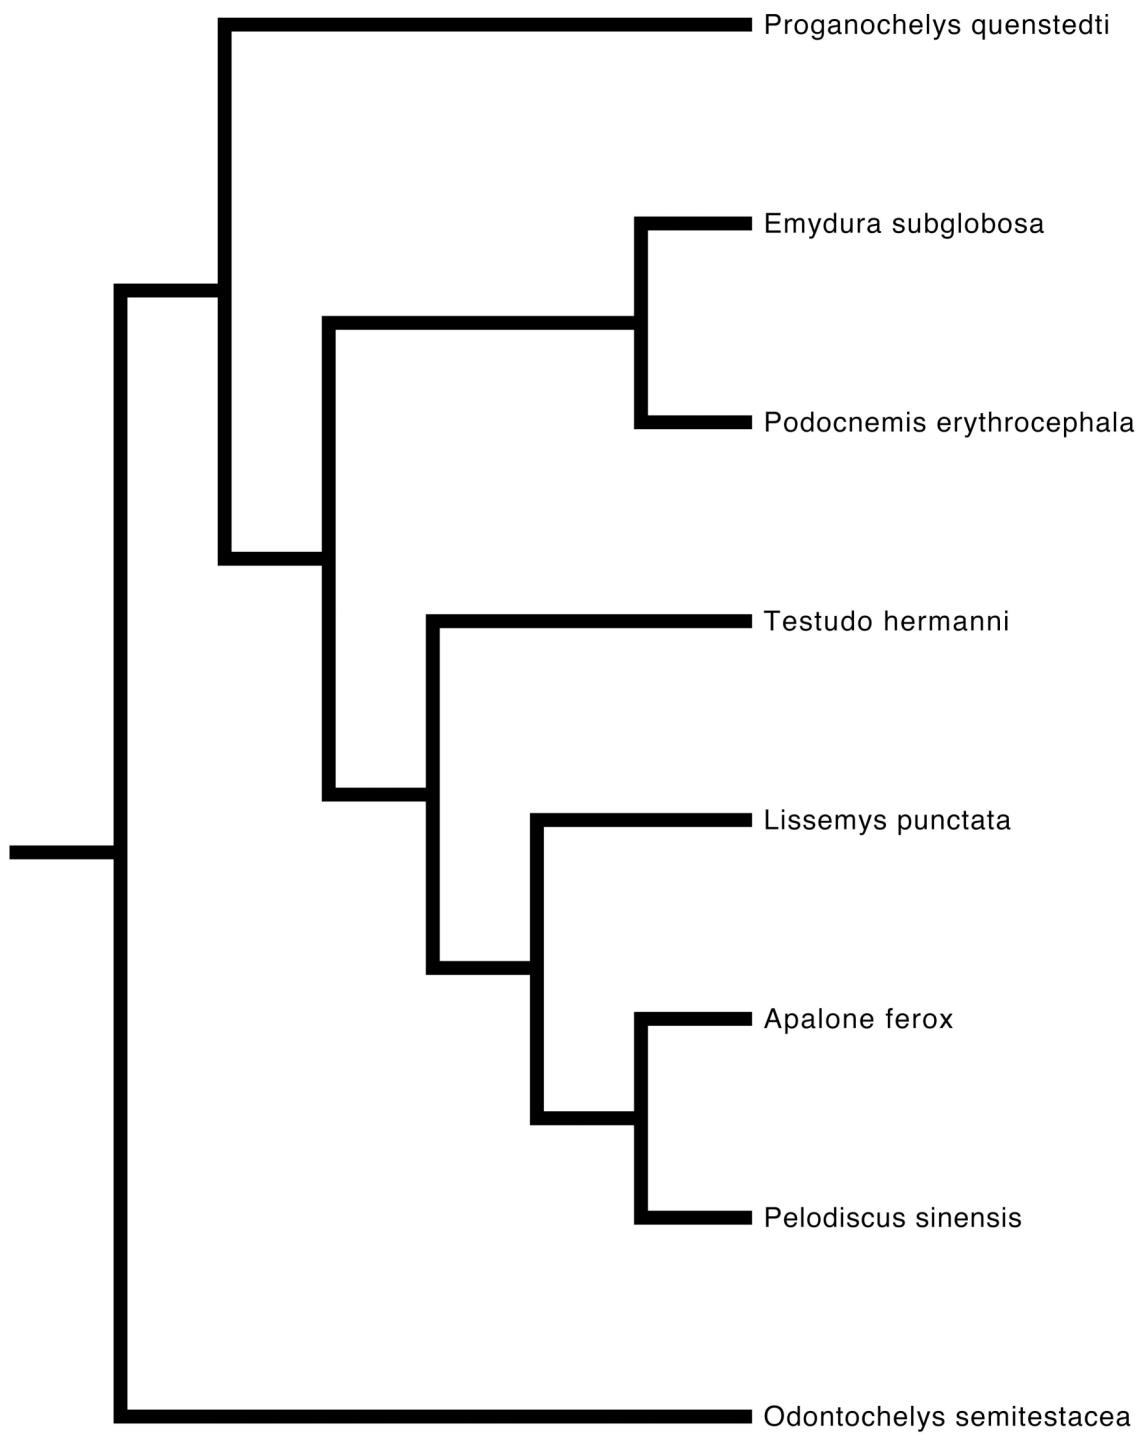

Choristodera/Archosauromorpha/Crurotarsi

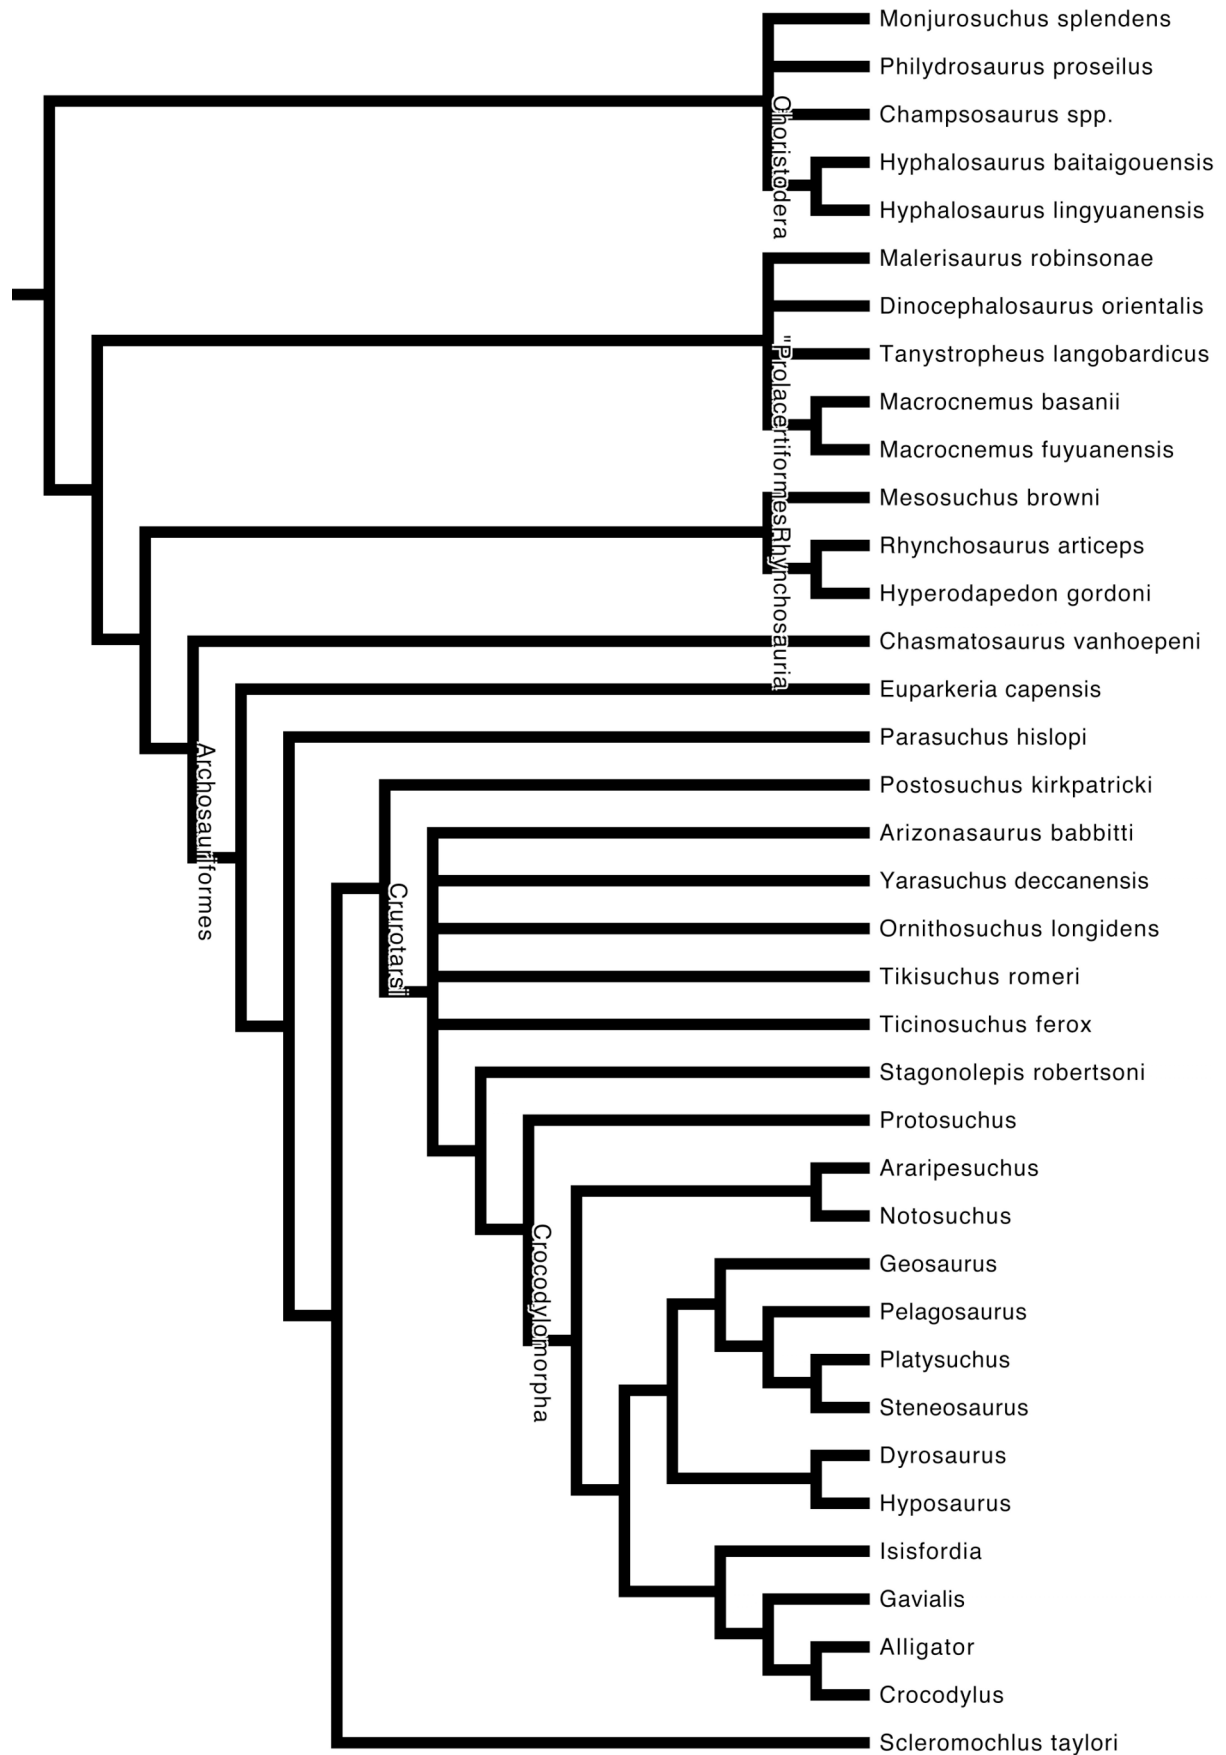

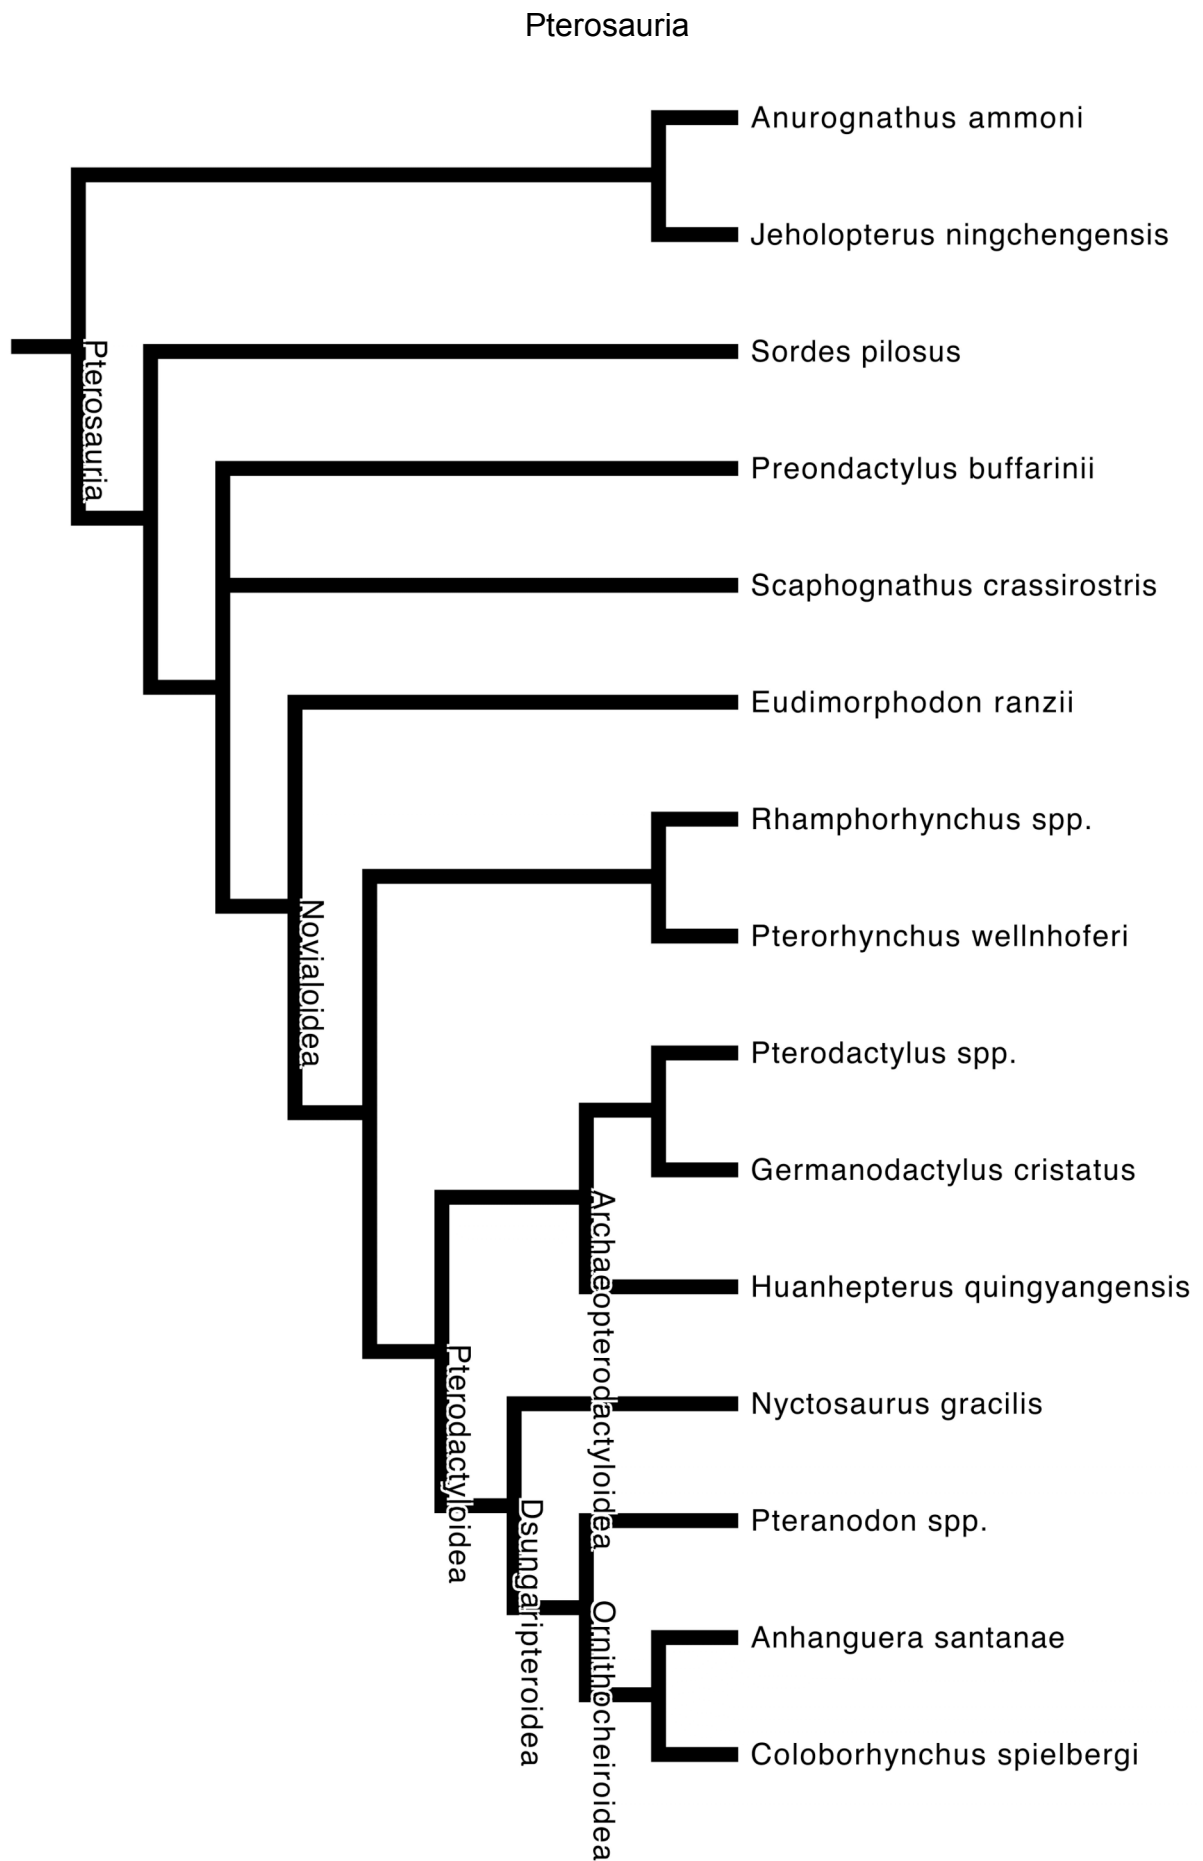

# Dinosauria

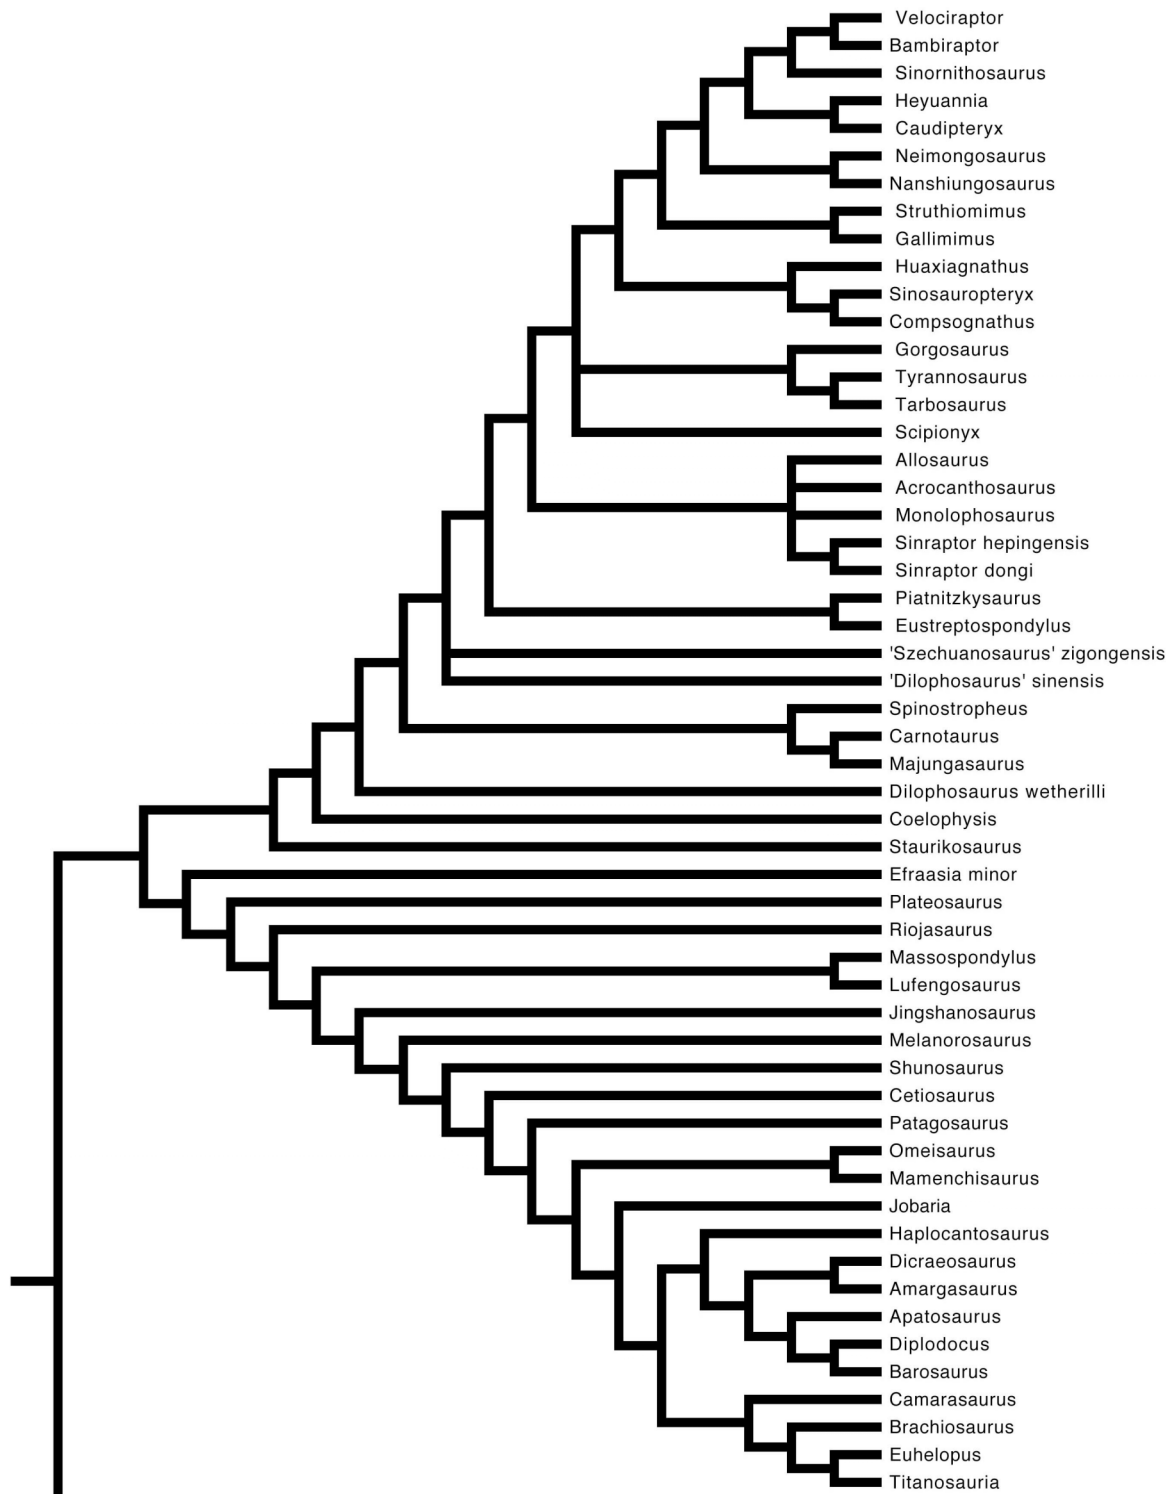

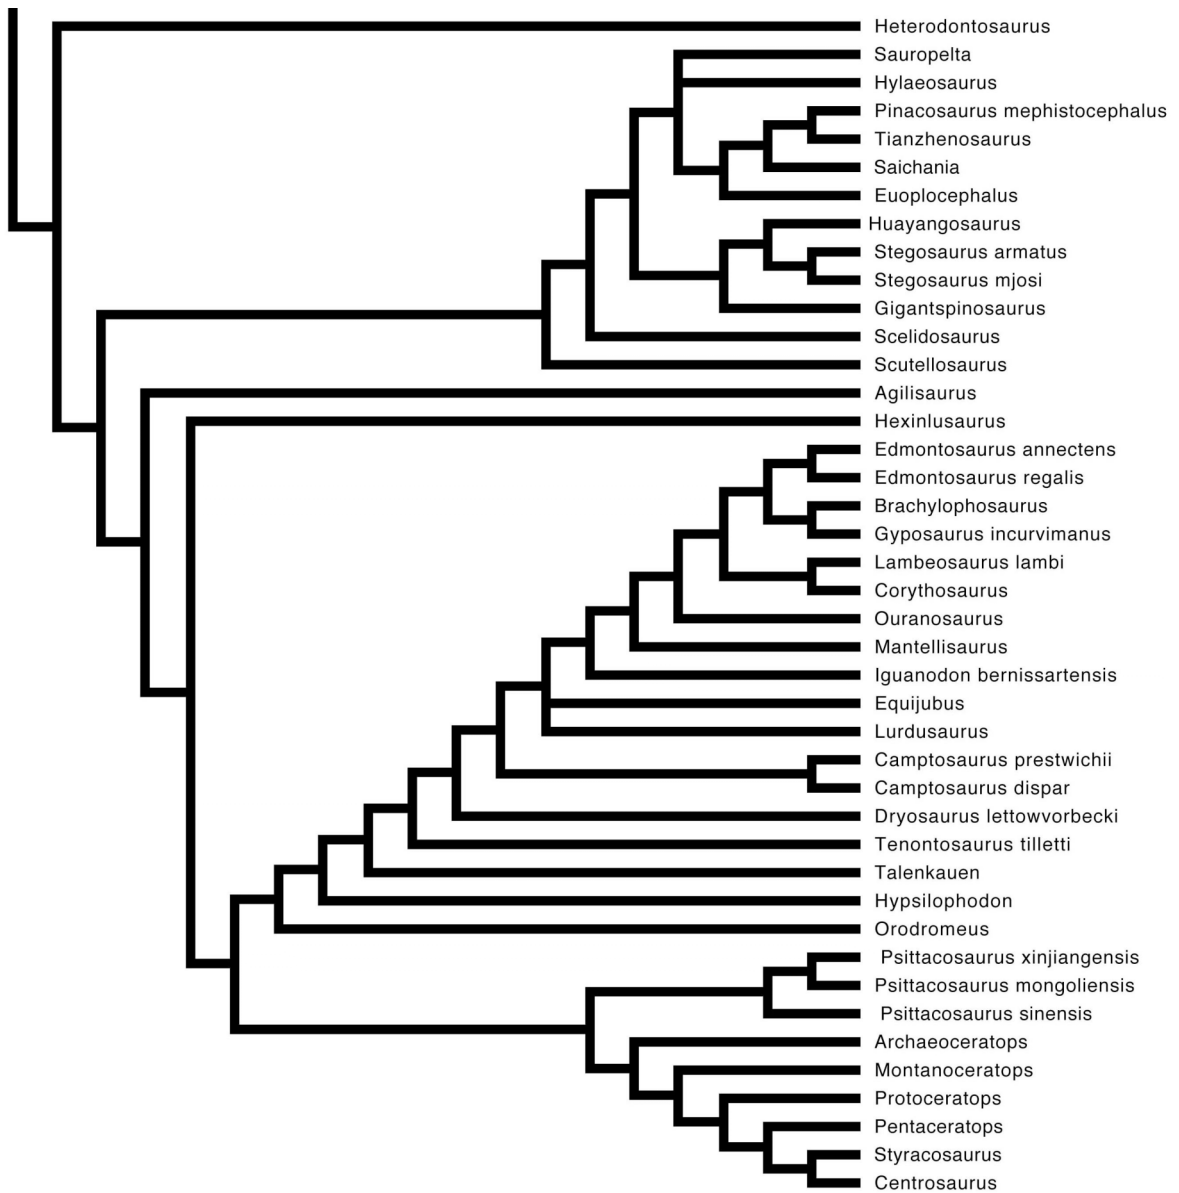



## 5. References

1. Romer AS, Price LW (1940) Review of the Pelycosauria. *Geol Soc Amer Spec Pap* 28:1-538.
2. Williston SW (1916) Synopsis of the American Permo-Carboniferous Tetrapoda. *Contr Walker Mus* 1:193-236.
3. Olson EC (1968) The family Caseidae. *Field Geol* 17:225–349.
4. Stovall JW, Price LI, Romer AS (1966) The postcranial skeleton of the giant Permian Pelycosaur *Cotylorhynchus romeri*. *Bull Mus Comp Zool* 135:1-30.
5. Langston W, Reisz RR (1981) *Aerosaurus wellesi*, new species, a varanopseid mammal-like reptile (Synapsida: Pelycosauria) from the Lower Permian of New Mexico. *J Vert Paleontol* 1:73-96.
6. Reisz RR (1986) Pelycosauria. Pp. 1-102, In: *Handbuch der Paläoherpetologie – (Part 17A)*, eds. Kuhn O, Wellnhofer P. Gustav Fischer Verlag. Stuttgart.
7. Von Huene F (1925) Ein neuer Pelycosaurier aus der Unteren Permformation Sachsens. *Geol und Palaeontol Abh* 14(5).
8. Colbert EH (1948) The mammal-like reptile *Lycaenops*. *Bull Amer Mus Nat Hist* 89:353-404.
9. Govender R, Rubidge BS, Renaut AJ (2002) The first complete vertebral column of a basal tapinocephalid dinocephalian (Synapsida: Therapsida). *South Afr J Sci* 98:391-392.
10. Ray S, Chinsamy A (2003) Functional aspects of the postcranial anatomy of the Permian dicynodont *Diictodon* and its ecological implications. *Palaeontol* 46:151–183.
11. Cluver MA (1978) The skeleton of the mammal-like reptile *Cistecephalus* with evidence of a fossorial mode of life. *Ann South Afric Mus* 76:213–246.
12. Olson EC, Byrne F (1938) Osteology of *Aulacocephalodon peavoti*. *J Geol* 46:177–190.
13. Ray S (2006) Functional and evolutionary aspects of the postcranial anatomy of dicynodonts (Synapsida Therapsida). *Palaeontol* 49:1263–1286.
14. Fourie H, Rubidge BS (2007) The postcranial skeletal anatomy of the therocephalian *Regisaurus* (Therapsida: Regisauridae) and its utilization for biostratigraphic correlation. *Palaeont Afr* 42:1-16.
15. Brink AS (1950) Notes on a second specimen of *Homodontosaurus kitchingi*. *South Afric J Sci* 1950:118-119.

16. Broom R (1948) The skeleton of a very small therocephalian. *Ann Transvaal Mus* 21:39-41.
17. Brink AS, Kitching JW (1953) On *Levachia duvenhagei* and some other procynosuchids in the Rubidge collection. *South Afric J Sci* 1953:313-XXX.
18. Brink AS (1954) *Thrinaxodon* and some other *Lystrosaurus* zone cynodonts in the collection of the National Museum, Bloemfontein. *Researches of the Nasionale Museum* 1:115-126.
19. Jenkins FA JR (1971) The postcranial skeleton of African cynodonts. *Peabody Mus Nat Hist* 36:1-216.
20. Colbert EH, Kitching JW (1977) Triassic cynodont reptiles from Antarctica. *Amer Mus Novit* 2611:1-29.
21. Jenkins FA JR (1970) The Chanares (Argentina) Triassic reptile fauna. VII. The postcranial skeleton of the traversodontid *Massetognathus pascuali* (Therapsida, Cynodontia). *Breviora* 352:1-28.
22. Seeley HG (1895) Researches on the structure, organization and classification of fossil Reptilia. Part IX, Section 5. On the skeleton in new Cynodontia from the Karroo rocks. *Phil Trans R Soc Ser B* 186:59-148.
23. Bonaparte JF (1963) Descripción del esqueleto postcraneano de *Exaeretodon*. *Acta Geol Lilloana* 4:5-52.
24. Sánchez-Villagra MR, Narita Y, Kuratani S (2007) Thoracolumbar vertebral number: the first skeletal synapomorphy for afrotherian mammals. *Syst Biodiv* 5:1-7.
25. Modesto SP (1999) Observations on the structure of the Early Permian reptile *Stereosternum tumidum* Cope. *Pal afr* 35: 7–19.
26. Oelofsen B, Araújo DC (1987) *Mesosaurus tenuidens* and *Stereosternum tumidum* from the Permian Gondwana of both southern Africa and South America. *South Afric J Sci* 83:370–372.
27. Thommasen H, Carroll RL (1981) *Broomia*, the oldest known millerettid reptile. *Palaeontol* 24:379-390.
28. Gow CE (1972) The osteology and relationships of the Millerettidae (Reptilia: Cotylosauria). *J Zool Lond* 167:219–264.
29. Watson DMS (1957) Early history of the sauropsid reptiles. *Phil Trans Roy Soc Lond Ser B* 240(673):325–400.
30. Gow CE (1997) A reassessment of *Eunotosaurus africanus* Seeley (Amniota: Parareptilia). *Pal afr* 34:33–42.
31. Gow CE, De Klerk W (1997) First record of *Eunotosaurus* (Amniota: Parareptilia) from the Eastern Cape. *Pal afr* 34:27–31.



32. Berman DS, Reisz RR, Scott D, Henrici AC, Sumida SS, Martens T (2000) Early Permian bipedal reptile. *Science* 290:969–972.
33. Reisz RR, Scott D (2002) *Owenetta kitchingorum*, sp. nov., a small parareptile (Procolophonia: Owenettidae) from the Lower Triassic of South Africa. *J Vert Paleontol* 22:244–256.
34. deBraga M (2003) The postcranial skeleton, phylogenetic position, and probable lifestyle of the Early Triassic reptile *Procolophon trigoniceps*. *Canad J Earth Sci* 40:527–556.
35. Cisneros JC (2008) Taxonomic status of the reptile genus *Procolophon* from the Gondwanan Triassic. *Paleontologia Africana* 43:7–17.
36. Lee MSY (1997) A taxonomic revision of pareiasaurian reptiles: implications for Permian terrestrial Palaeoecology. *Modern Geology* 21:231–298.
37. Berman DS, Henrici AC, Kissel RA, Sumida SS, Martens T (2004) A new diadectid (Diadectomorpha), *Orobates pabsti*, from the Early Permian of central Germany. *Bull Carnegie Mus Nat Hist* 35:1–36.
38. Carroll RL (1969) A Middle Pennsylvanian captorhinomorph and the interrelationships of primitive reptiles. *J Paleont* 43:151–170.
39. Müller J, Berman DS, Henrici AC, Sumida SS, Martens T (2006) The basal eureptile *Thuringothyris mahlendorffae* from the Lower Permian of Germany. *J Paleont* 80: 726-739.
40. Berman DS, Reisz RR (1986) Captorhinid reptiles from the Early Permian of New Mexico, with description of a new genus and species. *Ann Carneg Mus* 55:1–28.
41. Heaton MJ, Reisz RR (1980) A skeletal reconstruction of the Early Permian captorhinid reptile *Eocaptorhinus laticeps* (Williston). *J Paleont* 54:136–143.
42. Sumida SS (1987) Two different vertebral forms in the axial column of *Labidosaurus* (Captorhinomorpha: Captorhinidae). *J Paleont* 61:155–167.
43. Clark J, Carroll RL (1973) Romeriid reptiles from the Lower Permian. *Bull Mus Comp Zool* 144:353–407.
44. Carroll RL (1969) A Middle Pennsylvanian captorhinomorph and the interrelationships of primitive reptiles. *J Paleont* 43:151–170.
45. Carroll RL (1964) The earliest reptiles. *J Linn Soc Lond Zool* 45:61–83.
46. Carroll RL, Baird D (1972) Carboniferous stem-reptiles of the family Romeriidae. *Bull Mus Comp Zool* 143:321–364.
47. Reisz RR (1981) A diapsid reptile from the Pennsylvanian of Kansas. PhD thesis. University of Kansas, Museum of Natural History. Special publication No.7.

48. Reisz RR, Berman DS, Scott D (1984) The anatomy and relationships of the Lower Permian reptile *Araeoscelis*. *J Vert Paleontol* 4: 57–67.
49. deBraga M, Reisz RR (1995) A new diapsid reptile from the uppermost Carboniferous (Stephanian) of Kansas. *Palaeontology* 38:199-212.
50. Gow CE (1975) The morphology and relationships of *Youngina capensis* Broom and *Prolacerta broomi* Parrington. *Paleontol Afr* 18:89–131.
51. Carroll RL (1975) Permo-Triassic “lizards” from the Karroo. *Paleontol Afr* 18:71–87.
52. Frey E, Sues H.-D, Munk W (1997) Gliding mechanism in the Late Permian Reptile *Coelurosauravus*. *Science* 275:1450-1452.
53. Carroll RL (1981) Plesiosaur ancestors from the Upper Permian of Madagascar. *Phil Trans Roy Soc Lond Ser B* 293:315–383.
54. Currie P (1980) A new younginid (Reptilia: Eosuchia) from the Upper Permian of Madagascar. *Canad J Earth Sci* 17:500–511.
55. Currie PJ, Carroll RL (1984) Ontogenetic changes in the eosuchian reptile *Thadeosaurus*. *J Vert Paleontol* 4(1):68-84.
56. Harris JM, Carroll RL (1977) *Kenyasaurus*, a new eosuchian reptile from the Early Triassic of Kenya. *J Paleontol* 51(1):139–149.
57. Currie P (1981) *Hovasaurus boulei*, an aquatic eosuchian from the Upper Permian of Madagascar. *Paleontol Afr* 24:99–168.
58. Currie P (1982) The osteology and relationships of *Tangasaurus mennelli* Haughton (Reptilia, Eosuchia). *Ann South Afr Mus* 86(8):247–265.

### **Ichthyopterygia plus *Hupehsuchus***

59. Carroll RL, Dong Z-M (1991) *Hupehsuchus*, an enigmatic aquatic reptile from the Triassic of China, and the problem of establishing relationships. *Phil Trans Roy Soc Lond Ser B* 331:131-153.
60. Motani R, Minoura N, Ando T (1998) Ichthyosaurian relationships illuminated by new primitive skeletons from Japan. *Nature* 393:255-257.
61. Nicholls EL, Chen W, Manabe M (2002) New material of *Qianichthyosaurus* Li, 1999 (Reptilia, Ichthyosauria) from the Late Triassic of southern China, and implications for the distribution of Triassic ichthyosaurs. *J Vertebr Paleontol* 22:759-765.
62. Dal Sasso C, Pinna G (1996) *Besanosaurus leptorhynchus* n. gen. n. sp., a new shastasaurid ichthyosaur from the middle Triassic of Besano (Lombardy, N. Italy). *Paleontologia Lombarda Nuova serie* 4:3-23.

63. Kosch BF (1990) A revision of the skeletal reconstruction of *Shonisaurus popularis* (Reptilia: Ichthyosauria). *J Vertebr Paleontol* 10:512-514.
64. McGowan C, Motani R (1999) A reinterpretation of the Upper Triassic ichthyosaur *Shonisaurus*. *J Vertebr Paleontol* 19:42-49.
65. Chen X, Cheng L (2003) A new species of large-sized and long-body ichthyosaur from the Late Triassic Guanling biota, Guizhou, China [In Chinese, English abstract]. *Geol Bull China* 22:228-235.
66. Maisch MW (1998) A new ichthyosaur genus from the Posidonia Shale (Lower Toarcian, Jurassic) of Holzmaden, SW-Germany with comments on the phylogeny of post-Triassic ichthyosaurs. *Neues Jahrbuch für Geologie und Paläontologie, Abhandlungen* 209:47-78.

### Thalattosauriformes

67. Müller J (2005): The anatomy of *Askeptosaurus italicus* from the Middle Triassic of Monte San Giorgio, and the interrelationships of thalattosaurs (Reptilia, Diapsida). *Canad J Earth Sci* 42:1347-1367.
68. Liu J, Rieppel O (2005) Restudy of *Anshunsaurus huangguoshuensis* (Reptilia: Thalattosauria) from the Middle Triassic of Guizhou, China. *Amer Mus Novit* 488:1-34.
69. Müller J, Renesto S, Evans SE (2005) The marine diapsid reptile *Endennasaurus* (Reptilia: Thalattosauriformes) from the Late Triassic of Italy. *Palaeontol* 48:15-30.
70. Rieppel O (1987) *Clarazia* and *Hescheleria*: a re-investigation of two problematical reptiles from the Middle Triassic of Monte San Giorgio (Switzerland). *Palaeontograph A* 195:101-129.
71. Jiang D-Y, Maisch MW, Sun YL, Matzke AT, Hao W-C (2004) A new species of *Xinpusaurus* (Thalattosauria) from the Upper Triassic of China. *J Vert Paleontol* 24:80-88.
72. Rieppel O (2000) Sauropterygia I - Placodontia, Pachypleurosauria, Nothosauroida, Pistosauroida. In: *Handbuch der Paläoherpetologie* 12A:1-134.
73. Huene F v (1936) *Henodus chelyops*, ein neuer Placodontier. *Palaeontographica, Abt. A* 84:99-148.
74. Pinna G, Nosotti S (1989) Anatomia, morfologia funzionale e paleoecologia del rettile placodonte *Psephoderma alpinum* Meyer, 1858. *Memoire della Società Italiana di Scienze Naturali e del Museo Civico di Storia Naturale di Milano* 25:17-50.
75. Lin K, Rieppel O (1998) Functional morphology and ontogeny of *Keichousaurus hui* (Reptilia, Sauropterygia). *Fieldiana Geol* 39:1-39.

76. Rieppel O, Lin K (1995) Pachypleurosaurs (Reptilia: Sauropterygia) from the Lower Muschelkalk, and a review of the Pachypleurosauroidea. *Fieldiana (Geology)*, n.s. 32:1-44.
77. Rieppel O (1989) A new pachypleurosaur (Reptilia: Sauropterygia) from the Middle Triassic of Monte San Giorgio, Switzerland. *Phil Trans Roy Soc Lond Ser B* 323:1-73.
78. Sander PM (1989) The pachypleurosaurids (Reptilia: Nothosauria) from the Middle Triassic of Monte San Giorgio (Switzerland) with the description of a new species. *Phil Trans Roy Soc Lond Ser B* 325:561-666.
79. Rieppel O, Li J, Liu J (2003) *Lariosaurus xingyiensis* (Reptilia: Sauropterygia) from the Triassic of China. *Canad J Earth Sci* 40:621-634.
80. Hänni K (2004) Die Gattung *Ceresiosaurus*. *Ceresiosaurus calgagnii* Peyer und *Ceresiosaurus lanzi* n.sp. (Lariosauridae, Sauropterygia). PhD Thesis. Paläontologisches Institut und Museum, University of Zürich, Zürich. 146p.
81. Rieppel O, Sander PM, Storrs GW (2002) The skull of the pistosaur *Augustasaurus* from the Middle Triassic of northwestern Nevada. *J. Vertebr. Paleontol.* 22:577-592.

### **Plesiosauria**

82. Carpenter K (1999) Revision of North American elasmosaurs from the Cretaceous of the Western Interior. *Paludicola* 2:148-173.
83. Welles SP (1962) A new species of elasmosaur from the Aptian of Columbia and a review of the cretaceous plesiosaurs. *University of California Publications in Geological Science* 44:1-96.
84. Creisler (2003) Plesiosauria translation and pronunciation guide: <http://www.dinosauria.com/dml/names/ples.html>.
85. Carpenter K (1996) A review of short-necked plesiosaurs from the Cretaceous of the Western Interior, North America. *N Jb Geol Paläont Abh* 201:259-287.
86. Hampe O (1992) Ein großwüchsiger Pleiosauridae (Reptilia: Plesiosauria) aus der Unterkreide (oberes Aptium) von Kolumbien. *Courier Forschungsinstitut Senckenberg* 145:1-32.
87. Smith AS (2003) Cladistic analysis of the Plesiosauria (Reptilia: Sauropterygia). In Department of Earth Science, Faculty of Science, pp. 91. Bristol: University of Bristol.
88. Welles SP (1949) A new elasmosaur from the Eagle Ford Shale of Texas. *Fondren Science Series* 1:1-28.
89. Welles SP (1952) A review of the North American creaceous elasmosaurs. *University of California Publications in Geological Science* 29:47-144.

90. Welles SP (1970) The longest neck in the ocean. *University of Nebraska NEWS* 50:1-2.
91. Romer AS, Lewis AD (1959) A mounted skeleton of the giant plesiosaur *Kronosaurus*. *Breviora* 112:1-15.
92. Druckenmiller PS, Russel AP (2008) A phylogeny of Plesiosauria (Sauropterygia) and its bearing on the systematic status of *Leptocleidus* Andrews, 1922. *Zootaxa* 1863, 1-120.
93. Linder H (1913) Beiträge zur Kenntnis der Plesiosaurier-Gattungen *Peloneustes* und *Pliosaurus*. Nebst Anhang: Über die beiden ersten Halswirbel der Plesiosaurier. *Geologische und Palaeontologische Abhandlungen, Neue Folge* 11:339-409.
94. O'Keefe FR (2001) A cladistic analysis and taxonomic revision of the Plesiosauria (Reptilia: Sauropterygia). *Acta Zool Fennica* 213:1-63.
95. Storrs GW (1997) Morphological and taxonomic clarification of the genus *Plesiosaurus*. In: Callaway JM, Nichols EL (Eds.), *Ancient Marine Reptiles*, pp. 145-190. San Diego: Academic Press.

### **Squamata**

96. Hoffstetter R, Gasc J-P (1969) Vertebrae and ribs of modern reptiles. In *Biology of the Reptilia, Volume 1: Morphology* (Gans C. ed.). Academic Press, London. Pp. 201-310.

### **Rhynchocephalia**

97. Carroll RL (1985) A pleurosaur from the Lower Jurassic and the taxonomic position of the Sphenodontida. *Palaeontographica, Abteilung A* 189:1–28.

### **Choristodera**

98. Brown B (1905) The osteology of *Champsosaurus* Cope. *Amer Mus Nat Hist Mem* 9(1):1-26.
99. Gao K, Fox RC (1998) New choristoderes (Reptilia: Diapsida) from the Upper Cretaceous and Palaeocene, Alberta and Saskatchewan, Canada, and phylogenetic relationships of Choristodera. *Zool J Linn Soc* 124:303-353.
100. Gao K, Evans J, Ji Q, Norell M, Ji Sa (2000) Exceptional fossil material of a semi-aquatic reptile from China: the resolution of an enigma. *J Vertebr Paleontol* 20(3):417-421.
101. Matsumoto R, Evans SE, Manabe M (2007) The choristoderan reptile *Monjurosuchus* from the Early Cretaceous of Japan. *Acta Palaeontol Pol* 52 (2):329-350.

102. Gao K, Tang Z, Wang X (1999) A long-necked diapsid reptile from the Upper Jurassic/Lower Cretaceous of Liaoning Province, northeastern China. *Vertebrata Palasiatica* 37:1-8.

103. Ji Q, Ji S-a, Lü J, You H, Yuan C-X (2006) Embryos of Early Cretaceous Choristodera (Reptilia) from the Jehol Biota in western Liaoning, China. *J Paleont Soc Korea* 22(1):111-118.

104. Gao K-Q, Fox RC (2005) A new choristodere (Reptilia: Diapsida) from the Lower Cretaceous of western Liaoning Province, China, and phylogenetic relationships of Monjurosuchidae. *Zool J Linn Soc* 145:427-444.

#### **“Prolacertiformes”**

105. Rieppel O, Li C, Fraser NC (2008) The skeletal anatomy of the Triassic protorosaur *Dinocephalosaurus orientalis* Li, from the Middle Triassic of Guizhou Province, Southern China. *J Vertebr Paleontol* 28:95-110.

106. Chatterjee S (1980) *Malerisaurus*, A new eosuchian reptile from the Late Triassic of India. *Phil Trans Roy Soc Lond Ser B* 291:163-200.

107. Peyer B (1931) B. Peyer: Die Triasfauna der Tessiner Kalkalpen II. *Tanystropheus longobardicus* Bass. sp. *Abhandlungen der schweizerischen Paläontologischen Gesellschaft* 50:5-110.

108. Wild R (1974) E. Kuhn-Schnyder und B. Peyer: Die Triasfauna der Tessiner Kalkalpen. XXIII. *Tanystropheus longobardicus* (Bassani) (Neue Ergebnisse). *Schweizerische Paläontologische Abhandlungen* 95:1-162.

109. Peyer B (1937) B. Peyer: Die Triasfauna der Tessiner Kalkalpen. XII. *Macrocnemus bassani* Nopcsa. *Abhandlungen der schweizerischen Paläontologischen Gesellschaft* 59 3–140.

110. Li C, Zhao L, Wang L (2007) A new species of *Macrocnemus* (Reptilia: Protorosauria) from the Middle Triassic of southwestern China and its palaeogeographical implication. *Science in China Series D: Earth Sciences* 50:1601-1605.

#### **Rhynchosauria**

111. Benton MJ (1983) The Triassic reptile *Hyperodapedon* from Elgin: functional morphology and relationships. *Phil Trans Roy Soc Lond Ser B* 302:605-717.

112. Benton MJ (1990) The Species of *Rhynchosaurus*, A rhynchosaur (Reptilia, Diapsida) from the Middle Triassic of England. *Phil Trans Roy Soc Lond Ser B* 328:213-306.

113. Dilkes DW (1998) The Early Triassic rhynchosaur *Mesosuchus browni* and the interrelationships of basal archosauromorph reptiles. *Phil Trans Roy Soc Lond Ser B* 353:501-541.

## Testudinata

114. Li C, Wu X-C, Rieppel O, Wang L-T, Zhao L-J (2008) An ancestral turtle from the Late Triassic of southwestern China. *Nature* 456:497-501.

115. Gaffney ES (1990) The comparative osteology of the Triassic turtle *Proganochelys*. *Bull Amer Mus Nat Hist* 194:1-263.

## Early Archosauriformes

116. Charig A, Krebs B, Sues H-D, Westphal F (1976) Thecodontia. In: Handbuch der Paläoherpetologie. 13:1-137.

117. Ewer RF (1965) The anatomy of the thecodont reptile *Euparkeria capensis* Broom. *Phil Trans Roy Soc Lond Ser B* 248(751):379-435.

118. Chatterjee S (1978) A primitive parasuchid (phytosaur) reptile from the Upper Triassic Maleri Formation of India. *Palaeontol* 21(1):83-127.

119. Chatterjee S (1985) *Postosuchus*, a new thecodontian reptile from the Triassic of Texas and the origin of tyrannosaurs. *Phil Trans Roy Soc Lond Ser B* 309:395-460.

120. Nesbitt SJ (2005) Osteology of the Middle Triassic pseudosuchian archosaur *Arizonasaurus babbitti*. *Historical Biology* 17:19-47.

121. Sen K (2005) A new raiisuchian archosaur from the Middle Triassic of India. *Palaeontol* 48:185-196.

122. Walker AD (1964) Triassic reptiles from the Elgin area: *Ornithosuchus* and the origin of carnosaurs. *Phil Trans Roy Soc Lond Ser B* 248:53-134.

123. Chatterjee S, Majumdar PK (1987) *Tikisuchus romeri*, a new raiisuchid reptile from the Late Triassic of India. *J Paleontol* 61(4):787-793.

124. Krebs B (1965) E. Kuhn-Schnyder und B. Peyer: Die Triasfauna der Tessiner Kalkalpen. XIX. *Ticinosuchus ferox* nov. gen. nov. sp. *Abhandlungen der schweizerischen Paläontologischen Gesellschaft* 81:1-140.

125. Walker, A. D. 1961. Triassic reptiles from the Elgin area: *Stagonolepis*, *Dasygnathus* and their allies. *Phil Trans R Soc Lond B* 244:103-204.

126. Benton MJ (1999) *Scleromochlus taylori* and the origin of dinosaurs and pterosaurs. *Phil Trans Roy Soc Lond Ser B* 354:1423-1446.

## Crocodylomorpha

127. Colbert EH; Mook CC (1951) The ancestral crocodylian *Protosuchus*. *Bull Amer Museum Nat Hist* 97:143-182.

128. Pol D (2005) Postcranial remains of *Notosuchus terrestris* (Archosauria: Crocodyliformes) from the Upper Cretaceous of Patagonia, Argentina. *Ameghiniana* 42:21-38.

129. Mueller-Töwe I (2006) Anatomy, phylogeny, and palaeoecology of the basal thalattosuchians (Mesoeucrocodylia) from the Liassic of Central Europe: In *Fachbereich 09 Chemie, Pharmazie und Geowissenschaften* pp. 369. Johannes Gutenberg-Universität Mainz, Mainz.

130. Jouve S, Iarochène M, Bouya B, Amaghazaz M (2006) A new species of *Dyrosaurus* (Crocodylomorpha, Dyrosauridae) from the early Eocene of Morocco: phylogenetic implications. *Zool J Linn Soc* 148:603-656.

131. Schwarz D, Frey E, Martin T (2006) The postcranial skeleton of the Hyposaurinae (Dyrosauridae; Crocodyliformes). *Palaeontology* 49:695-718.

132. Salisbury SW, Molnar RE, Frey E, Willis PMA (2006) The origin of modern crocodyliforms: new evidence from the Cretaceous of Australia. *Proc Roy Soc B* 273:2439-2448.

### **Pterosauria**

133. Rjabinin AN (1948) Remarks on a flying reptile from the Jurassic of the Kara-Tau. *Transactions of the Palaeontological Institute, Academy of Sciences, USSR* 15:86-93.

134. Bennet SC (2008) A second specimen of the pterosaur *Anuroganthus ammoni*. *Paläontol Zeit* 81:376-398.

135. Wang X, Zhou Z, Zhang F, Xu X (2002) A nearly completely articulated rhamphorhynchoid pterosaur with exceptionally well-preserved wing membranes and "hairs" from InnerMongolia, northeast China. *Chinese Science Bulletin* 47:226-230.

136. Sharov AG (1971) New flying Mesozoic reptiles from Kazakhstan and Kirgizija [in Russian; German translation by R. Wild]. *Proceedings of Paleontological Institute, USSR Academy of Sciences (Paleontologicheskii institut Akademii nauk SSSR. Trudy)* 130:104-113.

137. Wellnhofer P (1978) Pterosauria. In: *Handbuch der Paläoherpetologie* 19:1-82.

138. Wild R (1983) A new pterosaur (Reptilia, Pterosauria) from the Upper Triassic (Norian) of Friuli, Italy. *Atti Museo Friul Storia Nat* 5: 45-62.

139. Wellnhofer P (1975) Die Rhamphorhynchoidea (Pterosauria) der Oberjura-Plattenkalke Süddeutschlands. Teil II: Systematische Beschreibung. *Palaeontographica* 148:132-186.

140. Wild R (1978) Die Flugsaurier (Reptilia, Pterosauria) aus der Oberen Trias von Cene bei Bergamo, Italien. *Bollettino della Società Italiana* 17:176-256.



141. Bennet SC (2001) The osteology and functional morphology of the Late Cretaceous pterosaur *Pteranodon*. Part I. General description of osteology. *Palaeontographica Abt A* 260:1-112.
142. Bennet SC (2004) New information on the pterosaur *Scaphognathus crassirostris* and the pterosaur cervical series. *J Vert Paleontol* 25 (Suppl 3):38A.
143. Czerkas SA, Ji Q (2002) A new rhamphorhynchoid with a headcrest and complex integumentary structures; pp. 15-41 in Czerkas SJ, ed, Feathered Dinosaurs and the Origin of Flight. The Dinosaur Museum, Blanding, Utah.
144. Wellnhofer P (1970) Die Pterodactyloidea (Pterosauria) der Oberjura-Plattenkalke Süddeutschlands. *Abhandlung der Bayerischen Akademie der Wissenschaften, Neue Folge* 141:1-133.
145. Dong Z (1982) On a new Pterosauria (*Huanhepterus quingyangensis* gen. et sp. nov.) from Ordos, China. *Vertebrata PalAsiatica* 20:115-121.
146. Veldmeijer AJ (2003) Description of *Coloborhynchus spielbergi* sp. nov. (Pterodactyloidea) from the Albian (Lower Cretaceous) of Brazil. *Scripta Geologica* 125:35-139.

#### Dinosauria including Aves

147. Colbert EH (1970) A saurischian dinosaur from the Triassic of Brazil. *Amer Mus Novit* 2405:1-39.
148. Colbert EH (1989) The Triassic dinosaur *Coelophysis*. *Bull Mus North Ariz* 57:1-160.
149. Bonaparte JF, Novas FE, Coria RA (1990) *Carnotaurus sastrei* Bonaparte, the horned, lightly built carnosaur from the Middle Cretaceous of Patagonia. *Contributions in Science* 416:1-41.
150. Hu S-J (1993) A short report on the occurrence of *Dilophosaurus* from Jinning County, Yunnan Province. *Vertebrata PalAsiatica* 31:65-69 (in Chinese).
151. Welles SP (1984) *Dilophosaurus wetherilli* (Dinosauria: Theropoda): osteology and comparisons. *Palaeontographica Abteilung A* 185:85-180.
152. Sereno PC, Wilson JA, Conrad JL (2004) New dinosaurs link southern landmasses in the mid-Cretaceous. *Proc Roy Soc Lond Ser B* 271:1325-1330.
153. O'Connor PM (2007) The postcranial axial skeleton of *Majungasaurus crenetissimus* (Theropoda: Abelisauridae) from the Late Cretaceous of Madagascar. *Soc Vertebr Paleontol Mem* 8:127-162.
154. Gao Y-H (1993) A new species of *Szechuanosaurus* from the Middle Jurassic of Dashanpu, Zigong, Sichuan. *Vertebrata PalAsiatica* 31: 308-314 (in Chinese with English summary).

155. Currie PJ, Zhao X-J (1993) A new carnosaur (Dinosauria, Theropoda) from the Jurassic of Xinjiang, People's Republic of China. *Can J Earth Sci* 30:2037-2081.
156. Gao Y-H (1999) A complete carnosaur skeleton from Zigong, Sichuan. *Yangchuanosaurus hepingensis*. Sichuan Publishing House of Science and Technology, Chengdu, 100 pp (in Chinese with English summary).
157. Bonaparte JF (1986) Les dinosaures (Carnosaures, Allosauridés, Sauropodes, Cétiosauridés) du Jurassique Moyen de Cerro Córdor (Chubut, Argentine). *Annales de Paléontologie (Vert.-Invert.)* 72:247-289.
158. Harris JD (1998) A re-analysis of *Acrocanthosaurus atokensis*, its phylogenetic status, and palaeobiogeographic implications, based on a new specimen from Texas. *Bull New Mexico Mus Nat Hist Sci* 13:1-75.
159. Madsen JH Jr (1976) *Allosaurus fragilis*: a revised osteology. *Bull Utah Geol Survey* 109:1-163.
160. Zhao X-J, Currie PJ (1993) A large crested theropod from the Jurassic of Xinjiang, People's Republic of China. *Canadian Journal of Earth Sciences* 30: 2027-2036.
161. Sadleir RW, Barrett PM, Powell HP (2008) The anatomy and systematics of *Eustreptospondylus oxoniensis*, a theropod dinosaur from the Middle Jurassic of Oxfordshire, England. *Palaeontographical Society Monographs* 160:1–82.
162. Dal Sasso C, Signore M (1998) Exceptional soft-tissue preservation in a theropod dinosaur from Italy. *Nature* 392:383-387.
163. Chen P-J, Dong Z-M, Zhen S-N (1998) An exceptionally well-preserved theropod dinosaur from the Yixian Formation of China. *Nature* 391:147-152.
164. Hwang SH, Norell MA, Ji Q, Gao K-Q (2004) A large compsognathid from the Early Cretaceous Yixian Formation of China. *J Syst Palaeontol* 2:13-30.
165. Ostrom JH (1978) The osteology of *Compsognathus longipes* Wagner. *Zitteliana* 4:73-118.
166. Lü J-C (2003) A new oviraptorosaurid (Theropoda: Oviraptorosauria) from the Late Cretaceous of southern China. *J Vert Paleontol* 22:871-875.
167. Zhou Z-H, Wang X-L, Zhang F-C, Xu X (2002) Important features of *Caudipteryx* – evidence from two nearly complete new specimens. *Vertebrata Palasiatica* 38: 241-254 (in Chinese and English).
168. Burnham DA, Derstler KL, Currie PJ, Bakker RT, Zhou Z-H, Ostrom JH (2000) Remarkable new bird-like dinosaur (Theropoda: Maniraptora) from the Upper Cretaceous of Montana. *University of Kansas Paleontological Contributions* 13:1-13.

169. Norell MA, Makovicky PJ (2004) Dromaeosauridae. Pp. 196-209 in *The Dinosauria* (2nd Ed.) (Weishampel DB, Dodson P, Osmólska H, Eds), University of California Press.
170. Kobayashi Y, Lü J-C (2003) A new ornithomimid dinosaur with gregarious habits from the Late Cretaceous of China. *Acta Palaeontol Pol* 48:235-259.
171. Osmólska H, Roniewicz E, Barsbold R (1972) A new dinosaur, *Gallimimus bullatus* n. gen., n. sp. (Ornithomimidae) from the Upper Cretaceous of Mongolia. *Palaeontologia Polonica* 27:103-143.
172. Osborn HF (1917) Skeletal adaptations of *Ornitholestes*, *Struthiomimus*, *Tyrannosaurus*. *Bull Amer Mus Nat Hist* 35:733-771.
173. Zhang X-H, Xu X, Zhao X-J, Sereno PC, Kuang X-W, Tan L (2001) A long-necked therizinosauroid dinosaur from the Upper Cretaceous Iren Dabasu Formation of Nei Mongol, People's Republic of China. *Vertebrata Palasiatica* 39: 282-290 (in Chinese and English).
174. Dong Z-M, Yu H-L (1997) A new segnosaur from Mazongshan Area, Gansu Province, China. Pp. 90-95 in *Sino-Japanese Silk Road dinosaur expedition* (Dong Z-M, Ed.). China Ocean Press.
175. Brochu CA (2003) Osteology of *Tyrannosaurus rex*: insights from a nearly complete skeleton and high-resolution computed tomographic analysis of the skull. *Soc Vertebr Paleontol Mem* 7:1-138.
176. Maleev YA (1974) [Gigantic carnivores of the Family Tyrannosauridae]. *Sovetsko-Mongolskaya Paleontologicheskaya Ekspeditsiya Trudy* 1:132-191 (in Russian).
177. Lambe LM (1914) On a new genus and species of carnivorous dinosaur from the Belly River Formation of Alberta, with a description of the skull of *Stephanosaurus marginatus* from the same horizon. *Ottawa Naturalist* 28:13-20.
178. Yates AM (2007) The first complete skull of the Triassic dinosaur *Melanorosaurus* Haughton (Sauropodomorpha: Anchisauria). *Spec Pap Palaeontol* 77:9-55.
179. Galton PM; Upchurch P (2004) Prosauropoda. pp: 232-258. In: Weishampel DB; Dodson P; Osmólska H. *The Dinosauria*, Second Edition. University of California Press, Berkeley, CA.
180. Wilson JA; Sereno PC (1998) Early evolution and higher-level phylogeny of sauropod dinosaurs. *Soc Vertebr Paleontol Mem* 5:1-68.
181. Upchurch P, Barrett PM, Dodson P (2004) Sauropoda. pp: 259-324. In: Weishampel DB; Dodson P; Osmólska H. *The Dinosauria*, Second Edition. University of California Press, Berkeley, CA.

182. Wilson JA (2002) Sauropod dinosaur phylogeny: critique and cladistic analysis. *Zool J Linn Soc Lond* 136:217-276.
183. Santa-Luca AP (1980) The postcranial skeleton of *Heterodontosaurus tucki* (Reptilia, Ornithischia) from the Stormberg of South Africa. *Annals of the South African Museum* 79:159-211.
184. Owen R (1863) Monograph of the fossil Reptilia of the Liassic formations. Part 2. *Scelidosaurus harrisonii* (continued). *Palaeontographical Society Monographs* 14 (for 1860): 1-26 + 9 pls.
185. Colbert EH (1981) A primitive ornithischian dinosaur from the Kayenta Formation of Arizona. *Museum of Northern Arizona, Bulletin* 53: 1-61.
186. Maidment SCR, Wei G-B, Norman DB (2006) Re-description of the postcranial skeleton of the Middle Jurassic stegosaur *Huayangosaurus taibaii*. *J Vert Paleontol* 26:944-956.
187. Peng G-Z, Ye Y, Gao Y-H, Shu C-K, Jiang S (2005) *Jurassic dinosaur faunas in Zigong*. 236 pp. (in Chinese with English summary).
188. Gilmore CW (1915) Osteology of *Thescelosaurus*, an orthopodous dinosaur from the Lance Formation of Wyoming. *Proc United States Nat Mus* 49:591-616.
189. Carpenter K, Miles CA, Cloward K (2001) New primitive stegosaur from the Morrison Formation, Wyoming. Pp. 55-75 in *The Armored Dinosaurs* (Carpenter K, ed.). Indiana University Press.
190. Parish JC (2005) *The evolution and paleobiology of the dinosaurs (Ornithischia, Ankylosauria)*. Unpublished PhD dissertation, University of Oxford, pp.
191. Pang Q-Q, Cheng Z-W (1998) A new ankylosaur of Late Cretaceous from Tianzhen, Shanxi. *Progress in Natural Science* 8:326-334.
192. Pereda-Suberbiola J (1993) *Hylaeosaurus, Polacanthus* and the systematics and stratigraphy of Wealden armoured dinosaurs. *Geological Magazine* 130:767-781.
193. Maryanska T (1977) Ankylosauridae (Dinosauria) from Mongolia. *Palaeontologica Polonica* 37:85-151.
194. Carpenter K (1982) Skeletal and dermal armour reconstruction of *Euoplocephalus tutus* (Ornithischia: Ankylosauridae) from the Late Cretaceous Oldman Formation of Alberta. *Canad J Earth Sci* 19: 689-697.
195. Godefroit P, Pereda-Suberbiola X, Li H, Dong Z-M (1999) A new species of the ankylosaurid dinosaur *Pinacosaurus* from the Late Cretaceous of Inner Mongolia (P. R. China). *Bulletin de l'Institut Royal des Sciences Naturelles de Belgique, Sciences de la Terre* 69 (Suppl. B): 17-36.

196. Peng G-Z (1992) Jurassic ornithopod *Agilisaurus louderbacki* (ornithopoda, Fabrosauridae) from Zigong, Sichuan, China. *Vertebrata Palasiatica* 30:39-51 (in Chinese with English summary).
197. He X-L, Cai K-J (1984) *The Middle Jurassic dinosaurian fauna from Dashanpu, Zigong, Sichuan. Volume 1. The ornithopod dinosaurs*. Sichuan Scientific and Technical Publishing House, Chengdu, 71pp + 6 pls [in Chinese with English summary].
198. Scheetz RD (1999) *Osteology of Orodromeus makelai and the phylogeny of basal ornithopod dinosaurs*. Unpublished PhD dissertation, Montana State University, 186 pp.
199. Galton PM (1974) The ornithischian dinosaur *Hypsilophodon* from the Wealden of the Isle of Wight. *Bulletin of the British Museum (Natural History), Geology* 25: 1-152.
200. Novas FE, Cambiaso AV, Ambrosio A (2004) A new basal iguanodontian (Dinosauria, Ornithischia) from the Upper Cretaceous of Patagonia. *Ameghiniana* 41:75-82.
201. Galton PM (1981) *Dryosaurus*, a hypsilophodontid dinosaur from the Upper Jurassic of North America and Africa: postcranial skeleton. *Paläontologische Zeitschrift* 55:271-312.
202. Forster CA (1990) The postcranial skeleton of the ornithopod dinosaur *Tenontosaurus tilletti*. *J Vert Paleontol* 10:273-294.
203. You H-L, Luo Z-X, Shubin N-H, Witmer LM, Tang Z-L, Tang F (2003) The earliest-known duck-billed dinosaur from deposits of late Early Cretaceous age in northwest China and hadrosaur evolution. *Cretaceous Research* 24:347-355.
204. Taquet P, Russell DA (1999) A massively-constructed iguanodont from Gadoufaoua, Lower Cretaceous of Niger. *Annales de Paléontologie* 85:85-96.
205. Norman DB (1980) On the ornithischian dinosaur *Iguanodon bernissartensis* of Bernissart (Belgium). *Mémoires de l'Institut Royal des Sciences Naturelles de Belgique* 178: 1-103.
206. Norman DB (1986) On the anatomy of *Iguanodon atherfieldensis* (Ornithischia: Ornithopoda). *Bulletin de l'Institut Royal des Sciences Naturelles de Belgique, Sciences de la Terre* 56: 281-372.
207. Taquet P (1976) *Géologie et paléontologie du gisement de Gadoufaoua (Aptien du Niger)*. Cahiers de Paléontologie, Editions du Centre National de la Recherche Scientifique, 191 pp + 24 pls.
208. Gilmore CW (1909) Osteology of the Jurassic reptile *Camptosaurus*, with a revision of the species of the genus, and descriptions of two new species. *Proc United States Nat Mus* 36:197-302.

209. Galton PM, Powell HP (1980) The ornithischian dinosaur *Camptosaurus prestwichii* from the Upper Jurassic of England. *Palaeontol* 23:411-443.
210. Prieto-Marquez A (2007) Postcranial osteology of the hadrosaurid dinosaur *Brachylophosaurus canadensis* from the Late Cretaceous of Montana. Pp. 91-115 in *Horns and beaks: ceratopsian and ornithopod dinosaurs* (Carpenter K, ed.). Indiana University Press.
211. Lull RS, Wright NE (1942) Hadrosaurian dinosaurs of North America. *Geological Society of America, Special Paper* 40: 1-242.
212. Sereno PC (1987) The ornithischian dinosaur *Psittacosaurus* from the Lower Cretaceous of Asia and the relationships of the Ceratopsia. Unpublished PhD dissertation, Columbia University, 553 pp.
213. Sereno PC, Chao S-C (1988) *Psittacosaurus xinjiangensis* (Ornithischia: Ceratopsia), a new psittacosaur from the Lower Cretaceous of northwestern China. *J Vert Paleontol* 8:353-365.
214. You H-L, Dodson P (2003) Redescription of neoceratopsian dinosaur *Archaeoceratops* and the early evolution of Neoceratopsia. *Acta Palaeontol Pol* 48:261-272.
215. Brown B, Schlaikjer EM (1940) The structure and relationships of *Protoceratops*. *Annals of the New York Academy of Science* 40: 133-266.
216. Brown B, Schlaikjer EM (1942) The skeleton of *Leptoceratops* with the description of a new species. *Amer Mus Novit* 1169: 1-15.
217. Brown B (1917) A complete skeleton of the horned dinosaur *Monoclonius* and description of a second skeleton showing skin impressions. *Bull Amer Mus Nat Hist* 37: 281-306.
218. Wiman C (1930) Über Ceratopsia aus der Oberen Kreide in New Mexico. *Nova Acta Regiae Societatis Scientiarum Upsaliensis, Series 4* 7:1-19.
219. Lull RS (1933) A revision of the Ceratopsia or horned dinosaurs. *Memoirs of the Peabody Museum of Natural History* 3(3): 1-175.
220. Livezey BC, Zusi RL (2006) Higher-order phylogeny of modern birds (Theropoda, Aves: Neornithes) based on comparative anatomy: I. Methods and characters. *Bull Carneg Mus Nat Hist* 37:1-544.

#### **Additional references used for generating the tree topologies**

221. Sidor CA (2003) Evolutionary trends and the origin of the mammalian lower jaw. *Paleobiol* 29:605-640
222. Kemp TS (2005) The origin and evolution of mammals. Oxford University Press.

223. Fröbisch J (2007) The cranial anatomy of *Kombuisia frerensis* Hotton (Synapsida, Dicynodontia) and a new phylogeny of anomodont therapsids. *Zool J Linn Soc* 150: 117-144.
224. Müller J, Tsuji LA (2007) Impedance-matching hearing in Paleozoic reptiles: evidence of advanced sensory perception at an early stage of amniote evolution. *PLoS ONE* 2: e889. doi:10.1371/journal.pone.0000889.
225. Müller J (2003) Early Loss and Multiple Return of the Lower Temporal Arcade in Diapsid Reptiles. *Naturwissenschaften* 90:473-476.
226. Müller J (2004) The relationships among diapsid reptiles and the influence of taxon selection. in: Arratia G, Cloutier R, Wilson VH (eds.): Recent Advances in the Origin and Early Radiation of Vertebrates: 379-408, München (Dr. Friedrich Pfeil).
227. Müller J, Reisz RR (2006) The phylogeny of early eureptiles: comparing parsimony and Bayesian approaches in the investigation of a basal fossil clade. *Sys Biol* 55:503-511.
228. Müller J (2007) First record of a thalattosaur from the Upper Triassic of Austria. *J Vert Paleontol* 27: 236-240.
229. Vidal N, Hedges SB (2002) Higher-level relationships of caenophidian snakes inferred from four nuclear and mitochondrial genes. *Compt Rend Biologie* 325:987-995.
230. Townsend TM, Larson A, Louis E., Macey JR (2004) Molecular phylogenetics of Squamata: The position of snakes, amphisbanians, and dibamids, and the root of the squamate tree. *Sys Biol* 53:735-757.
231. Reynoso V-H (2005) Possible evidence of a venom apparatus in a Middle Jurassic sphenodontian from the Huizachal Red Beds of Tamaulipas, México. *J Vert Paleontol* 25:646-654.
232. Gasparini Z, Pol D, Spalletti L (2006) An unusual marine Crocodyliform from the Jurassic-Cretaceous boundary of Patagonia. *Science* 311:70-73.
233. Motani R (1999) Phylogeny of Ichthyopterygia. *J Vertebr Paleontol* 19:473-496.
234. Maisch MW, Matzke AT (2000) The Ichthyosauria. *Stuttgarter Beiträge zur Naturkunde B* 298:1-159.
235. Maisch MW, Pan XR, Sun ZY, Cai T, Zhang DP, Xie JL (2006) Cranial osteology of *Guizhouichthyosaurus tangae* (Reptilia: Ichthyosauria) from the Upper Triassic of China. *J Vertebr Paleontol* 26:588-597.
236. Fernández M (2007) Redescription and phylogenetic position of *Caypullisaurus* (Ichthyosauria: Ophthalmosauridae). *J Paleontol* 81:368-375.
237. Rieppel O (2001) The cranial anatomy of *Placochelys placodonta* Jaekel, 1902, and a review of the Cyamodontoidea (Reptilia, Placodonta). *Fieldiana Geol* 45:1-104.

238. Gaffney ES, Meylan PA (1988) A phylogeny of turtles. in Benton MJ (ed.): *The Phylogeny and Classification of the Tetrapods. Volume 1: Amphibians, Reptiles, Birds*: 157-219 Oxford (Clarendon Press).
239. Joyce WG, Gauthier JA (2004) Palaeoecology of Triassic stem turtles sheds new light on turtle origins. *Proc R Soc Lond B* 271:1-5.
240. Benton MJ (2007) *Paläontologie der Wirbeltiere* [German translation of 'Vertebrate Paleontology' 3rd edition]. München (Dr. Friedrich Pfeil).
241. Irmis RB, Nesbitt SJ, Padian K, Smith ND, Turner AH, Woody D, Downs A (2007) A Late Triassic dinosauromorph assemblage from New Mexico and the rise of dinosaurs. *Science* 317:358-361.
242. Wang X, Kellner AWA, Zhou Z, Almeida Campos D (2008) Discovery of a rare arboreal forest-dwelling flying reptile (Pterosauria, Pterodactyloidea) from China. *Proc Nat Acad Sci* 105:1983-1987.
243. Andres B, Ji Q (2008) A new pterosaur from the Liaoning Province of China, the phylogeny of the Pterodactyloidea, and convergence in their cervical vertebrae. *Palaeontology* 51:453-469.
244. Barrett PM, McGowan AJ, Page V (2009) Dinosaur diversity and the rock record. *Proc R Soc Lond B*: 10.1098/rspb.2009.0352.
245. Butler RJ, Upchurch P, Norman DB (2008) The phylogeny of the ornithischian dinosaurs. *J Syst Palaeontol* 6:1-40.
246. Carrano MT, Sampson SD (2008) The phylogeny of Ceratosauria (Dinosauria: Theropoda). *J Syst Palaeontol* 6:183-236.
247. Gates TA, Sampson SD (2007) A new species of *Gryposaurus* (Dinosauria: Hadrosauridae) from the late Campanian Kaiparowits Formation, southern Utah, USA. *Zool J Linn Soc* 151:351-376.
248. Holtz TR Jr (2004) Tyrannosauoidea. 111-136. In *The Dinosauria* (Second Edition). Eds Weishampel DB, Dodson P, Osmolska H. University of California Press, Berkeley, 861 pp.
249. Holtz TR Jr, Molnar RE, Currie PJ (2004) Basal Tetanurae. 71-110. In *The Dinosauria* (Second Edition). Eds Weishampel DB, Dodson P, Osmolska H. University of California Press, Berkeley, 861 pp.
250. Langer MC, Benton MJ (2006) Early dinosaurs: a phylogenetic study. *J Syst Palaeontol* 4:309-358.
251. Maidment SCR, Norman DB, Barrett PM, Upchurch P (2008) Systematics and phylogeny of Stegosauria (Dinosauria: Ornithischia). *J Syst Palaeontol* 6:367-407.



252. Norman DB (2004) Basal iguanodontia. 413-437. In *The Dinosauria* (Second Edition). Eds Weishampel, DB., Dodson, P. & Osmolska, H. University of California Press, Berkeley, 861 pp.

253. Senter P (2007) A new look at the phylogeny of Coelurosauria (Dinosauria: Theropoda). *J Syst Palaeontol* 5:429-463.

254. Vickaryous MK, Maryanska T, Weishampel DB (2004) Ankylosauria. 363-392. In *The Dinosauria* (Second Edition). Eds Weishampel DB, Dodson P, Osmolska H. University of California Press, Berkeley, 861 pp.

255. You H-L, Dodson P (2004) Basal Ceratopsia. 478-493. In *The Dinosauria* (Second Edition). Eds Weishampel DB, Dodson P, Osmolska H. University of California Press, Berkeley, 861 pp.

### **6. Sources of sketches in Figure 1 of main text.**

The sketches of representative skeletons among the diversity sampled in this study are modified versions from figures from different sources (256-259), listed below.

256. Ji Q et al. (2002) The earliest eutherian mammal. *Nature* 416:816-822.

257. Lydekker R (1896) *The Royal Natural History*. Vol V. (Frederick Warne & Co., London) pp 576.

258. Sander PM (1994) *Reptilien*. Enke, Stuttgart, 226 pp.

259. Mazin J-M (2001) Mesozoic marine reptiles: an overview. Pp. 95-117. In: Mazin J-M, de Buffrénil V (eds.), *Secondary Adaptation of Tetrapods to Life in Water*.

## 7. Output of the correlation analyses

Tree input:

(Diadectidae, Limnoscelidae), ((Caseidae, (Varanopidae, (Haptodus, (Biarmosuchia, (Dinocephalia, (Gorgonopsia, (Dicynodontia, (Therocephalia, (Thrinaxodontidae, ((Traversodontidae, Cynognathidae), (Monotremata, (Marsupialia, Eutheria))))))))), ((Mesosauridae, ((Eunotosaurus, Millerettidae), (Nyctiphruretus, (Bolosauridae, (Procolophonoidea, (Macroleter, Pareiasauria))))), (Coelostegus, ((Captorhinidae, Thuringothyris), (Anthracodromeus, (Brouffia, (Cephalerpeton, (Hylonomus, (Paleothyris, (Protorothyris, (Areoscelidia, (Younginiformes, (Claudiosaurus, ((Palaeagama, Coelurosauravus), ((Kuehneosauridae, Drepanosauridae), ((Hupehsuchus, Ichthyopterygia), (Thalattosauriformes, (((Eosauropterygia, (Placodus, (Henodus, Psephoderma))), (Squamata, (Pleurosauridae, Sphenodontidae))), (Choristodera, (Dinocephalosaurus, (Malerisaurus, (Tanystropheus, (Macrocnemus, ((Prolacerta, Protorosaurus), (Rhynchosauria, (Testudinata, (Chasmatosaurus, (Euparkeria, (Parasuchus, ((Postosuchus, (Aetosauridae, Crocodylomorpha)), (Pterosauria, (Ornithischia, (Sauropodomorpha, (Coelophysis, (Neoceratosauria, (Carnosauria, (Tyrannosauroidae, (Compsognathidae, (Palaeognathae, Neognathae))))))))))))))))))):0.0010):0.0010):0.0010):0.0010):0.0010):0.0010):0.0010):0.0010):0.0010):0.0010):0.0010):0.0010);

Values:

| Taxa              | Presacrals<br>(trait 1) | CP ratio<br>(trait 2) |
|-------------------|-------------------------|-----------------------|
| Aetosauridae      | 24                      | 0.33                  |
| Anthracodromeus   | 32                      | 0.125                 |
| Areoscelidia      | 25.61                   | 0.27                  |
| Bolosauridae      | 24.6                    | 0.22                  |
| Brouffia          | 31                      | 0.13                  |
| Captorhinidae     | 25.48                   | 0.2                   |
| Carnosauria       | 22.93                   | 0.41                  |
| Cephalerpeton     | 28                      | 0.18                  |
| Chasmatosaurus    | 25                      | 0.32                  |
| Choristodera      | 27.55                   | 0.44                  |
| Claudiosaurus     | 24                      | 0.33                  |
| Coelophysis       | 23                      | 0.43                  |
| Coelostegus       | 29                      | 0.17                  |
| Coelurosauravus   | 21                      | 0.38                  |
| Compsognathidae   | 22.96                   | 0.44                  |
| Dinocephalosaurus | 53                      | 0.51                  |
| Drepanosauridae   | 24                      | 0.33                  |
| Eosauropterygia   | 38.8                    | 0.47                  |
| Eunotosaurus      | 15                      | 0.33                  |
| Euparkeria        | 22                      | 0.32                  |
| Henodus           | 19                      | 0.32                  |
| Hupehsuchus       | 37                      | 0.24                  |
| Hylonomus         | 26                      | 0.19                  |
| Ichthyopterygia   | 41.46                   | 0.24                  |
| Kuehneosauridae   | 26                      | 0.27                  |
| Macrocnemus       | 25.54                   | 0.31                  |
| Macroleter        | 23                      | 0.2                   |
| Malerisaurus      | 23                      | 0.39                  |
| Mesosauridae      | 28.43                   | 0.36                  |
| Millerettidae     | 23.82                   | 0.17                  |
| Neoceratosauria   | 22.8                    | 0.43                  |
| Nyctiphruretus    | 24                      | 0.33                  |



Reg Trait 1 on Trait 2

|              | N    | Mean(PGLS-a) | Var(PGLS-a) | Mean(FIC) | Var(FIC) | Mean(TIPS) | Var(TIPS) |
|--------------|------|--------------|-------------|-----------|----------|------------|-----------|
| Alpha        | 1.00 | 14.71        | 0.00        | 0.00      | 0.00     | 0.00       | 0.00      |
| Correlation  | 1.00 | -0.27        | 0.00        | -0.25     | 0.00     | -0.25      | 0.00      |
| Percent R^2  | 1.00 | 7.12         | 0.00        | 6.28      | 0.00     | 6.33       | 0.00      |
| LnLikelihood | 1.00 | -187.15      | 0.00        | -196.32   | 0.00     | -190.38    | 0.00      |
| Intercept 0  | 1.00 | 33.23        | 0.00        | 23.28     | 0.00     | 32.15      | 0.00      |
| Slope 0      | 1.00 | 3.25         | 0.00        | 22.30     | 0.00     | 2.54       | 0.00      |
| Intercept 1  | 1.00 | -22.76       | 0.00        | -26.11    | 0.00     | -17.60     | 0.00      |
| Slope 1      | 1.00 | 9.62         | 0.00        | 11.81     | 0.00     | 7.93       | 0.00      |

95% CI on the Regression Intercept (1 on 2) including sampling variance and variance due to unknown phylogeny =  
 33.23 +/- 6.36 = 26.86 - 39.59

95% CI on Regression Slope (1 on 2) including sampling variance and variance due to unknown phylogeny =  
 -22.76 +/- 18.86 = -41.62 - -3.90

Reg Trait 2 on Trait 1

|              | N    | Mean(PGLS-a) | Var(PGLS-a) | Mean(FIC) | Var(FIC) | Mean(TIPS) | Var(TIPS) |
|--------------|------|--------------|-------------|-----------|----------|------------|-----------|
| Alpha        | 1.00 | 3.57         | 0.00        | 0.00      | 0.00     | 0.00       | 0.00      |
| Correlation  | 1.00 | -0.26        | 0.00        | -0.25     | 0.00     | -0.25      | 0.00      |
| Percent R^2  | 1.00 | 6.58         | 0.00        | 6.28      | 0.00     | 6.33       | 0.00      |
| LnLikelihood | 1.00 | 153.29       | 0.00        | 152.16    | 0.00     | 128.24     | 0.00      |
| Intercept 0  | 1.00 | 0.37         | 0.00        | 0.37      | 0.00     | 0.40       | 0.00      |
| Slope 0      | 1.00 | 0.06         | 0.00        | 0.21      | 0.00     | 0.05       | 0.00      |
| Intercept 1  | 1.00 | 0.00         | 0.00        | 0.00      | 0.00     | 0.00       | 0.00      |
| Slope 1      | 1.00 | 0.00         | 0.00        | 0.00      | 0.00     | 0.00       | 0.00      |

95% CI on the Regression Intercept (1 on 2) including sampling variance and variance due to unknown phylogeny =  
 0.37 +/- 0.12 = 0.25 - 0.49

95% CI on Regression Slope (1 on 2) including sampling variance and variance due to unknown phylogeny =  
 0.00 +/- 0.00 = 0.00 - 0.00
